# Supplementary material for: Multi-omics and pathway analyses of genome-wide associations implicate regulation and immunity in verbal declarative memory performance
Source: PubMed Central journal article supplement (PMC10799499; doi:10.1186/s13195-023-01376-6), 2024-01-20
Supplement: 13195_2023_1376_MOESM1_ESM.pdf [file 13195_2023_1376_MOESM1_ESM.pdf]

# 1. Cohorts

## Discovery Studies with Memory GWAS

The CHARGE consortium includes large prospective community-based cohort studies with genome-wide variation data and multiple phenotypes involving measures of memory functions<sup>1</sup>. These cohorts and several other community-based cohorts have collaborated to complete the genome-wide association study (GWAS) of memory<sup>2</sup>. All of the discovery cohorts in the GWAS were analyzed for memory-related genetic pathways and some details are described as follows.

### The Atherosclerosis Risk in Communities Study (ARIC)

The ARIC study is a prospective population-based study of atherosclerosis and clinical atherosclerotic diseases in 15,792 men and women, including 11,478 white participants, drawn from 4 United States communities (Suburban Minneapolis, Minnesota; Washington County, Maryland; Forsyth County, North Carolina; and Jackson, Mississippi). In the first 3 communities, the sample reflects the demographic composition of the community. In Jackson, only black residents were enrolled. Participants were between age 45 and 64 years at their baseline examination in 1987-1989 when blood was drawn for DNA extraction and participants consented to genetic testing<sup>3</sup>. A total of 15,020 participants, of which 10,898 were white, were genotyped at the Broad Institute, Boston, Massachusetts, and 9,345 of the latter passed QC criteria for genotyping and were available for analysis after application of all exclusion criteria. Vascular risk factors and outcomes, including transient ischemic attack and stroke, were determined in a standard fashion<sup>4</sup>. The second clinical examination of the ARIC Study cohort in 1990-1992 included a neuropsychological evaluation<sup>5</sup>, with the Delayed Word Recall Test (DWRT)<sup>6</sup>, to assess memory performance. Given the relatively young age of the cohort at the second examination (age range = 48-67 years) and low expected prevalence of dementia, a formal assessment for dementia was not performed. Among white participants with genome-wide data, after excluding 275 participants with a history of stroke, 9,188 participants were available for a GWAS of delayed word list recall (visually presented word list). In addition, among white participants with genome-wide data, 509 have recently completed a detailed neuropsychological test battery as part of an ancillary study<sup>7,8</sup>, including the logical memory test from the revised version of the Wechsler Memory Scale (WMS-R). After excluding 79 participants with a history of stroke, 430 ARIC white participants were available for a GWAS of delayed paragraph recall.

### The Cardiovascular Health Study (CHS)

The CHS is a population-based cohort study of risk factors for vascular disease in adults 65 years or older conducted across 4 field centers in the United States: Sacramento County, California; Washington County, Maryland; Forsyth County, North Carolina; and Pittsburgh, Allegheny County, Pennsylvania<sup>9</sup>. The original predominantly white cohort of 5,201 persons was recruited in 1989-1990 from a random sample of people on Medicare eligibility lists. An additional 687 African-Americans were enrolled in 1992-1993, for a total sample of 5,888. Vascular risk factors and outcomes, including transient ischemic attack, stroke and dementia, were determined in a standard fashion<sup>10,11</sup>. DNA was extracted from blood samples drawn on all participants who consented to genetic testing at their baseline examination in 1989-90 or 1992-1993. In 2007-2008, genotyping was performed at the General Clinical Research Center's Phenotyping/Genotyping Laboratory at Cedars-Sinai on 3,980 CHS participants who were free of cardiovascular disease at baseline and who had DNA available for genotyping. Because most other cohorts were predominantly white, the African

American participants were excluded from this analysis to limit the potential for false positive associations due to population stratification. Among white participants, genotyping was attempted in 3,397 participants and was successful in 3,295 persons. As part of the CHS Cognition Study<sup>11,12</sup>, in 1992-94 and again, in 1997-99, participants were invited to undergo a detailed neuropsychological assessment including the CVLT<sup>13</sup> and the logical memory test from the WMS-R<sup>14</sup>. Among participants with genome-wide data: after exclusion of 47 participants with dementia and of 26 participants with history of stroke, 334 participants were available for a GWAS of delayed word list recall (CVLT); after exclusion of 4 participants with dementia, 472 participants were available for a GWAS of delayed paragraph recall.

### **Framingham Heart Study (FHS)**

The FHS is a three-generation, single-site, community-based, prospective cohort study that was initiated in 1948 to investigate risk factors for cardiovascular disease including stroke. It now comprises 3 generations of participants: the original cohort followed since 1948 (Original)<sup>15</sup>; their offspring and spouses of the offspring, followed since 1971 (Offspring)<sup>16</sup>; and children from the largest offspring families enrolled in 2000 (Gen 3)<sup>17</sup>. The Original cohort enrolled 5,209 men and women who comprised two-thirds of the adult population then residing in Framingham, MA, USA. Survivors continue to receive biennial examinations. The Offspring cohort comprises 5,124 persons (including 3,514 biological offspring) who have been examined approximately once every 4 years. Participants in the first two generations were invited to undergo an initial neuropsychological test battery in 1999-2005<sup>18</sup>, including the logical memory test from the Original WMS<sup>19</sup>. Neuropsychological testing in Gen 3 only began in 2009 and is not included in these analyses. The population of Framingham was virtually entirely whites in 1948 when the Original cohort was recruited. Vascular risk factors and outcomes, including transient ischemic attack, stroke and dementia, were identified prospectively since 1948 through an ongoing system of FHS clinic and local hospital surveillance<sup>20,21</sup>. Participants had DNA extracted and provided consent for genotyping in the 1990s. Genotyping was performed at Affymetrix (Santa Clara, CA) through an NHLBI funded SNP-Health Association Resource (SHARe) project and was successful in 4,519 persons from the Original and Offspring cohorts. Of these 4,519 persons, 4,116 were alive in 1999 when the neuropsychological study began. Of these, 2,642 participants have undergone neuropsychological testing including logical memory. We excluded 30 participants with a neurological condition that might confound the cognitive assessment (e.g. brain tumor or severe head injury), 7 participants with dementia and 52 participants with a history of stroke. Of the remaining 2,553 participants, 2,493 were aged 45 years or older and were available for a GWAS of delayed paragraph recall.

### **Lothian Birth Cohort 1921 (LBC1921) and 1936 (LBC1936)**

These samples include surviving participants from the Scottish Mental Surveys of 1932 or 1947 (SMS1932 and SMS1947), having been born, respectively in 1921 (LBC1921) and 1936 (LBC1936)<sup>22-24</sup>. They were all Caucasian and almost all lived independently in the Lothian region (Edinburgh city and surrounding area) of Scotland. The LBC1921 cohort comprised 550 members while the LBC1936 cohort included 1,091 participants. At age 79 approximately, LBC1921 participants underwent a neuropsychological examination including the logical memory test from the WMS-R<sup>14</sup>. At age 70, LBC1936 participants took a battery of cognitive tests<sup>22</sup>, including the logical memory test from the Wechsler Memory Scale-IIIUK (WMS-IIIUK)<sup>25</sup>. Genotyping was performed at the Wellcome Trust Clinical Research Facility (WTCRF) Genetics Core, Western General Hospital, Edinburgh. Among participants with good quality genome-wide data, after exclusion of 5 participants for dementia and 43 participants for history of stroke, 469 individuals from the LBC1921 cohort were available for a GWAS on paragraph delayed recall. Among participants with genome-wide data, after

exclusion of 50 participants for history of stroke, 953 individuals from the LBC1936 cohort were available for a GWAS on delayed paragraph recall.

### **Rush Memory and Aging Project (MAP)**

The MAP, started in 1997, enrolled older men and women from assisted living facilities in the Chicago area with no evidence on dementia at baseline<sup>26</sup>. Since October 1997, 1,285 participants completed their baseline evaluation, of whom 1,118 were non-Hispanic white. The study was approved by the institutional review board of Rush University Medical Center. The follow-up rate of survivors exceeds 90%. Similar to the ROS, participants agreed to annual clinical evaluations and signed both an informed consent and an Anatomic Gift Act form donating their brains, spinal cords, and selected nerves and muscles to Rush investigators at the time of death<sup>27,28</sup>. A more detailed description of the MAP has been published previously<sup>27,28</sup>. Participants were invited to take a neuropsychological test battery, including delayed recall of Story A from the logical memory subset of the Wechsler Memory Scale-Revised<sup>14</sup>, and delayed word list recall from the CERAD battery<sup>29</sup>. DNA was extracted from whole blood, lymphocytes, or frozen postmortem brain tissue. Genotyping was performed at the Broad Institute's Center for Genotyping and the Translational Genomics Research Institute. Among participants with available memory tests and genome-wide genotypes, after exclusion of 51 participants with dementia and 86 participants with a history of stroke, 751 individuals were available for a GWAS of delayed paragraph recall and delayed word list recall (visually presented word list).

### **Orkney Complex Disease Study (ORCADES)**

ORCADES is an ongoing, family-based, cross-sectional study that seeks to identify genetic factors influencing cardiovascular and other disease risk in the population isolate of the Orkney Isles in northern Scotland<sup>30</sup>. The North Isles of Orkney, the focus of this study, consist of a subgroup of ten inhabited islands with census populations varying from ~30 to ~600 people on each island. The first phase of data collection was carried out in Orkney between 2005 and 2007. Informed consent and blood samples were provided by 1019 Orcadian volunteers who had at least one grandparent from the North Isles of Orkney. Participants were invited to take a neuropsychological test battery including the logical memory test adapted from the Original Wechsler Memory Scale<sup>19</sup>. Genotyping was performed at the Helmholtz Centre in Munich on a subset of 719 participants. An additional 169 individuals were genotyped by Integragen in Paris. Among participants with genome-wide data, we excluded 7 participants with a history of stroke. Of the 537 remaining individuals, aged 20 years or older, 419 participants aged 45 years or older were available for a GWAS of delayed paragraph recall.

### **Religious Orders Study (ROS)**

The ROS, started in 1994, enrolled Catholic priests, nuns, and brothers, aged 53 years from about 40 groups in 12 states<sup>26</sup>. Since January 1994, 1,132 participants completed their baseline evaluation, of whom 1,001 were non-Hispanic white. The study was approved by the institutional review board of Rush University Medical Center. The follow-up rate of survivors exceeds 90%. Participants were free of known dementia at enrollment, agreed to annual clinical evaluations, and signed both an informed consent and an Anatomic Gift Act form donating their brains at time of death<sup>27</sup>. A more detailed description of the ROS has been published previously<sup>27</sup>. Participants were invited to take a neuropsychological test battery, including delayed recall of Story A from the logical memory subset of the Wechsler Memory Scale-Revised<sup>14</sup>, and delayed word list recall from the Consortium to Establish a Registry for Alzheimer's Disease (CERAD) battery<sup>29</sup>. DNA was extracted from whole blood, lymphocytes, or frozen postmortem brain tissue. Genotyping was performed at

the Broad Institute's Center for Genotyping and the Translational Genomics Research Institute. Among participants with available memory tests and genome-wide genotypes, after exclusion of 58 participants with dementia and 65 participants with a history of stroke, 687 individuals were available for a GWAS of delayed paragraph recall and delayed word list recall (visually presented word list).

### **Aging Gene-Environment Susceptibility - Reykjavik Study (AGES-Reykjavik)**

The AGES-Reykjavik Study is a single center prospective cohort study based on the Reykjavik Study. The Reykjavik Study was initiated in 1967 by the Icelandic Heart Association to study cardiovascular disease and risk factors. The cohort included men and women born between 1907 and 1935 who lived in Reykjavik at the 1967 baseline examination. Re-examination of surviving members of the cohort was initiated in 2002 as part of the AGES-Reykjavik Study. The AGES-Reykjavik Study is designed to investigate aging using a multifaceted comprehensive approach that includes detailed measures of brain function and structure. All cohort members were European Caucasians. Briefly, as part of a comprehensive examination, all participants answered a questionnaire, underwent a clinical examination and had blood drawn<sup>31</sup>. All consenting participants were offered to take a neuropsychological test battery<sup>32</sup>, including the California Verbal Learning Test (CVLT)<sup>13</sup>, to assess memory performance. Among participants with genome-wide data, after exclusion of 126 participants with dementia and 266 participants with a history of stroke, 2616 participants were available for a GWAS of delayed word list recall (CVLT).

### **Erasmus Rucphen Family (ERF)**

The Erasmus Rucphen Family (ERF) study is a family-based cohort study in a genetically isolated population in the Netherlands<sup>33,34</sup>, including 3,000 participants. Participants are all descendants of a limited number of founders living in the 19<sup>th</sup> century. Extensive genealogical data is available for this population. The study protocol included venous puncture for DNA isolation and chemistry, cognitive evaluation, cardiovascular examination, eye assessments and body composition measurements. All participants gave informed consent and the study was approved by the medical ethics committee at Erasmus MC University Medical Center. Genotyping was done at the Human Genotyping Facility, Genetic Laboratory Department of Internal Medicine, Erasmus MC, Rotterdam, and at the Genotyping Center of Leiden University, The Netherlands. In total, 2,385 samples from the ERF Study were available with good quality genotyping data. Participants were invited to undergo a neuropsychological evaluation<sup>35</sup>, which included the Dutch version of Rey's Auditory Verbal Learning Test (RAVLT)<sup>36</sup>. Among participants with genome-wide data, we excluded 20 individuals with a history of stroke. Of the remaining 2 119 participants, aged 20 years or older, 1,267 participants were aged 45 years or more and were available for performance GWAS of delayed word list recall (RAVLT).

### **Genetic Epidemiology Network of Arteriopathy (GENOA)**

GENOA is a study of hypertensive sibships designed to investigate the genetic underpinnings of hypertension and target organ damage. In the initial phase of the GENOA study (Phase I: 1996-2001), all members of sibships containing  $\geq 2$  individuals with essential hypertension clinically diagnosed before age 60 were invited to participate, including both hypertensive and normotensive siblings (1,583 non-Hispanic whites from Rochester, MN, and 1,841 African Americans from Jackson, MS). The diagnosis of essential hypertension was established based on blood pressure levels measured at the study visit ( $>140$  mmHg average systolic BP or  $>90$  mmHg average diastolic BP) or a prior diagnosis of hypertension and current treatment with antihypertensive medications. Exclusion criteria were secondary hypertension, alcoholism or drug abuse, pregnancy, insulin-dependent diabetes mellitus, or active malignancy. In the second phase of

the GENOA study (Phase II: 2000-2004), 1,241 white and 1,482 African American participants were successfully re-recruited to measure potential target organ damage due to hypertension. The Genetics of Microangiopathic Brain Injury (GMBI) study (2001-2006) is an ancillary study of GENOA undertaken to investigate susceptibility genes for ischemic brain injury. Phase II GENOA participants that had a sibling willing and eligible to participate in the GMBI study underwent a neurocognitive testing battery to assess several domains of cognitive function including Rey's Auditory Verbal Learning Test (RAVLT)<sup>36</sup> (967 whites and 1,010 African Americans). Genotyping was performed at the Mayo Clinic, Rochester (MN). GENOA white participants who were less than 45 years of age (N=56) or had history of stroke (N=22) were excluded from the analysis, leaving a total of 889 participants. Among participants with genome-wide genotype data, 758 GENOA white participants from 378 sibships were available for a GWAS on delayed word list recall (RAVLT).

### **Helsinki Birth Cohort Study (HBCS)**

The source cohort for the HBCS comprised 4,130 women and 4,630 men born as singletons at Helsinki University Central Hospital during 1934-44, who had birth and child welfare records and were living in Finland in 1971<sup>37</sup>. To approach an intended sample size of N=2,000, a random subsample of 2,902 subjects was invited to participate in the study; 2,003 of them (1,075 women and 928 men) were finally included<sup>38</sup>. Participants who could come to the examination center were invited to take a neuropsychological test battery, including the delayed word list recall from the CERAD battery<sup>29</sup>. 1,063 participants attended neuropsychological testing between February 2005 and February 2011. DNA was extracted from 1,728 randomly selected participants of the HBCS. Genotyping was conducted at the Wellcome Trust Sanger Institute, Cambridge, UK. Among participants with available cognitive tests and genome-wide genotypes, after exclusion of 19 participants with a history of stroke, 888 individuals were available for a GWAS of delayed word list recall (visually presented word list). The study was approved by the Institutional Review Board of the National Public Health Institute, and informed consent was obtained from all participants.

### **Croatian Cohorts: Split and Korčula**

The Croatia-Korčula study is part of a larger genetic epidemiology research program in Croatian island isolates, "10,001 Dalmatians." The genetic epidemiology research program in Croatian island isolates began in 1999<sup>39</sup>, then expanded to study human genetic variation and effects of isolation and inbreeding<sup>40,41</sup>, and finally entered the phase of focusing on diseases and gene mapping studies<sup>42-44</sup>. A total of 969 participants were included in the CROATIA-Korčula study. The Croatia-Split study included 535 persons collected in 2009 from the general (outbred) population of Split. Split has a population of >100,000 and is the second largest city in Croatia. Participants from the Croatia-Korčula and Croatia-Split studies were invited to undergo a neuropsychological examination including the Rey's Auditory Verbal Learning Test (RAVLT)<sup>36</sup>. Croatia-Korčula genotyping was performed at the Institute of Human Genetics, Helmholtz Zentrum München, Germany and CROATIA-Split genotyping was performed at AROS Applied Biotechnology, Aarhus, Denmark. Genotyping was successful in 898 and 499 participants, respectively, for Croatia-Korčula and Croatia-Split. Among participants with genome-wide data, 25 and 10 participants with a history of stroke were excluded from the Croatia-Korčula and Croatia-Split studies, respectively. Of the remaining 577 and 471 individuals, aged 20 years or more, 472 and 303 participants aged 45 years or older were available for a GWAS of delayed word list recall (RAVLT).

## **Rotterdam Study**

The Rotterdam Study is a population-based prospective cohort study among inhabitants of a district of Rotterdam (Ommoord), The Netherlands, and aims to examine the determinants of disease and health in the elderly with a focus on neurogeriatric, cardiovascular, bone, and eye disease<sup>45,46,47</sup>. In 1990-1993, 7,983 persons 55 years of age or over (Rotterdam Study-I) participated and were re-examined every 3 to 4 years. In 1999, 3,011 individuals who had become 55 years of age or moved into the study district since the start of the study were added to the cohort (Rotterdam Study-II), and in 2006 a further extension of the cohort was initiated in which 3,932 subjects aged 45–54 years and living in the same district were included (Rotterdam Study-III)<sup>48</sup>. All participants had DNA extracted at their first visit. Genotyping was attempted in participants with high-quality extracted DNA. Genotyping was done at the Human Genotyping Facility, Genetic Laboratory Department of Internal Medicine, Erasmus MC, Rotterdam, the Netherlands. Participants underwent several neuropsychological tests at the baseline and follow-up examinations<sup>49</sup>, including a 15-word verbal learning test based on Rey's recall of words<sup>50</sup>. Participants are continuously monitored for major events, including dementia and stroke, by automated linkage of the general practitioners' records and hospital discharge files with the study database<sup>51,52</sup>. Among participants with good quality genome-wide data: after exclusion of participants with dementia (N=124 for the Rotterdam Study-I, N=56 for the Rotterdam Study-II and N=6 for the Rotterdam Study-III) and participants with a history of stroke (N=168 for the Rotterdam Study-I and N=102 for the Rotterdam Study-II), 2,067 participants from the Rotterdam Study-I, 1,533 participants from the Rotterdam Study-II and 1,935 participants from the Rotterdam Study-3 were available for a GWAS of word list delayed recall (visually presented word list).

## **Study of Health in Pomerania (SHIP)**

The Study of Health in Pomerania is a population-based epidemiological study in the region of Western Pomerania, Germany<sup>53</sup>. In brief, from the total population of West Pomerania comprising 213,057 inhabitants in 1996, a two-stage stratified cluster sample of adults aged 20–79 years was drawn. The net sample (without migrated or deceased persons) comprised 6,265 eligible subjects, out of which 4,308 completed their baseline examinations. From July 2007 to October 2010 the Life-Events and Gene-Environment Interaction in Depression (LEGENDE) study was carried out in the SHIP cohort. A diagnostic interview for mental disorders was performed based on Diagnostic and Statistical Manual for Mental Disorders (IV edition) diagnostic criteria<sup>54</sup>. As part of the SHIP-LEGENDE project<sup>55</sup>, participants have been invited to take a cognitive test battery, including a German adaptation of Rey's Auditory Verbal Learning Test (RAVLT). Genotyping was performed at Affymetrix (Santa Clara, CA). The genetic data analysis workflow was created using the Software InforSense. Genetic data were stored using the database Caché (InterSystems). Among participants with available cognitive tests and genome-wide genotypes, we excluded 62 participants with dementia and 19 participants with a history of stroke. Of the remaining 2,027 individuals, aged 20 years or older, 1,474 participants aged 45 years or older were available for a GWAS of delayed word list recall (RAVLT).

## **Tasmanian Study of Cognition and Gait (TASCOG)**

TASCOG is a study of cerebrovascular mechanisms underlying gait, balance and cognition in a population-based sample of Tasmanian people aged at least 60 years. Individuals aged 60–86 years (N=395) living in Southern Tasmania, Australia, were randomly selected from the electoral roll to participate in the study. Individuals were excluded if they lived in a nursing home, had a contraindication for magnetic resonance scanning (MRI) or were unable to walk without a gait aid<sup>56</sup>. Participants were invited to take a

neuropsychological test battery<sup>57</sup>, including among other tests the Hopkins Verbal Learning Test (HVLT)<sup>58</sup>. DNA was extracted from peripheral blood samples by proteinase K digestion following cell lysis, then phenol-chloroform purification. DNA was genotyped at the Diamantina Institute and Institute of Molecular Biosciences, University of Queensland, Australia, for 370 participants, and call rates were greater than 97% for all samples. Genotypes for 22 individuals were excluded, either because they were closely related to other individuals, they were outliers in a population ancestry analysis or their sex predicted from genotypes did not match sex as recorded in the database. Among the 348 remaining participants with available genome-wide data, after exclusion of 2 participants with dementia and 15 participants with a history of stroke, 331 individuals were available for performance GWAS of delayed word list recall (HVLT).

## **Replication Studies with Memory GWAS**

Three cohorts in the replication study of the GWAS analysis<sup>2</sup> have also completed the whole-genome association analysis and been investigated as replication studies of memory-related genetic pathways. These cohorts were described as follows.

### **Sydney Memory and Ageing Study (Sydney MAS)**

The Sydney MAS was initiated in 2005 to examine the clinical characteristics and prevalence of mild cognitive impairment and related syndromes, and to determine the rate of change in cognitive function over time<sup>59</sup>. Participants were invited to take a neuropsychological test battery, including among other tests the RAVLT<sup>36</sup>, and Story A of the Wechsler Memory Scale, 3<sup>rd</sup> edition, (WMS-III)<sup>60</sup>. DNA was genotyped at the Ramaciotti Centre, UNSW, Australia. Among the 925 participants with available genome-wide data, after exclusion of 37 participants with a history of stroke, 880 individuals were available for performing a GWAS of delayed word list recall (RAVLT) and 887 for delayed paragraph recall (WMS-III).

### **Women's Genome Health Study (WGHS)**

The WGHS is a large cohort for genome-wide genetic analysis of a wide range of clinical phenotypes among >25,000 women, 45 years or older at baseline and with ongoing follow-up observation, now for approximately 18 years<sup>61</sup>. The population is derived from participants in the Women's Health Study who provided a blood sample at baseline. By design, participants included in the WGHS were free from dementia and stroke at baseline. Women above 70 years of age were contacted for a baseline telephone cognitive assessment, including a measure of delayed paragraph recall using the East Boston Memory Test, and the Telephone Interview of Cognitive Status 10-item word list. Genome-wide genotyping in the WGHS was performed using the Illumina (San Diego, CA) HumanHap 300 Duo "+" platform including a total 339,596 SNPs passing quality control filters among 23,294 participants with verified European ancestry. Among participants with available memory tests and genome-wide genotypes, 3,542 individuals of verified European ancestry were available for genetic analysis of delayed word list recall (TICS) and of delayed paragraph recall.

### **Nurses' Health Study (NHS)**

The NHS began in 1976, when 121,700 female registered nurse women, aged 30 to 55 years, living in 11 USA states completed a mailed questionnaire on lifestyle and health. Every 2 years, follow-up questionnaires have been mailed to participants to update their information, and >90% follow-up of the total possible person-time has been maintained<sup>62</sup>. For the study of cognitive function, participants aged 70 years and older free of diagnosed stroke were selected (dementia diagnosis was not ascertained). From 1995 to 2001, 21,085 eligible women were contacted for a baseline telephone cognitive assessment, including a measure of

delayed paragraph recall using the East Boston Memory Test, and the Telephone Interview of Cognitive Status 10 –item word list; 19,415 (92%) completed the interview. The study was approved by the Institutional Review Board of the Brigham and Women’s Hospital<sup>62</sup>. Genotyping was conducted at the Broad Institute using a nested case-control design. Among participants from 6 independent case-control studies in the NHS cohort with available memory tests and genome-wide genotypes, 2,066 / 1,773 individuals were available for a GWAS of delayed paragraph / word list recall (NHS-CGEM): 756 / 655 from the diabetes case-control dataset (NHS-T2D), 358 / 307 from the coronary heart disease case-control dataset, 553 / 450 from the breast cancer case-control dataset (NHS-CHD), 179 / 166 from the glaucoma case-control dataset (NHS-GLAU), 80 / 76 from the kidney stone case-control dataset (NHS-KS), and 141 / 119 from the endometrial cancer case-control dataset (NHS-ENDO).



## 2. Samples for the Differential Gene Expression Analyses

We performed a gene-set differential expression (DE) analysis using significant component genes (meta-analysis gene p-value,  $\text{Gene\_p} \leq 1\text{E-}06$ ) from verbal declarative memory-associated pathways. Our aim was to examine if these pathway genes collectively had stronger DE by cognitive status in brain tissues compared to an identical number of random genes. Three curated human gene expression studies of cognitive traits were selected from the Gene Expression Omnibus <sup>63</sup>. The first study (ID: GDS4135) tested DE over Braak stages I-II, III-IV, and V-VI of neurofibrillary tangle pathology in astrocytes <sup>64</sup>. The second study (ID: GDS4231) examined DE between HIV-1-associated neurocognitive disorders and uninfected controls in postmortem brain tissue <sup>65</sup>. The third study (ID: GDS4358) investigated the trend of expression changes across uninfected (controls), HIV-1 infected only (HIV-only), HIV-1 infected with substantial neurocognitive impairment (HIV-NCI), and HIV-NCI with HIV encephalitis (HIV-NCI-HIVE) participants in tissue samples from basal ganglia, the frontal cortex, and white matter <sup>66</sup>. For the third study, we performed tests both including (Trend I test) and omitting (Trend II test) the uninfected controls.

Three rodent DE studies were performed using homologues (identified using the NCBI HomoloGene tool <sup>67</sup>) of the significant memory-associated pathway genes in hippocampal tissue. The first study (ID: GDS2082) investigated DE in 15-month-old house mice with age-related spatial memory deficits versus 2-month-old normal mice <sup>68</sup>. The second study (ID: GDS2639) compared expression in Norway rats by cognitive impairment status (impaired versus unimpaired cognition) <sup>69</sup>. The third study (ID:

GDS520) investigated DE among Norway rates with age-dependent cognitive decline over 4, 14, and 24 months <sup>70</sup>.

### 3. Supplemental Tables

**Table S1: Sample size and the number of SNPs in the paragraph delayed recall GWAS from each discovery and replication cohort**

| <b>Discovery Study</b>   | <b>Size</b> | <b>Mapped Genes</b> | <b>SNPs Mapped to Genes</b> | <b>Independent SNPs Mapped to Genes</b> |
|--------------------------|-------------|---------------------|-----------------------------|-----------------------------------------|
| ARIC                     | 430         | 36,370              | 1,629,523                   | 1,132,387                               |
| CHS                      | 472         | 35,917              | 1,487,112                   | 1,061,114                               |
| FHS                      | 2493        | 37,910              | 1,661,479                   | 1,130,951                               |
| LBC1921                  | 469         | 36,370              | 1,629,809                   | 1,139,838                               |
| LBC1936                  | 953         | 36,370              | 1,629,809                   | 1,137,922                               |
| MAP                      | 751         | 36,342              | 1,621,490                   | 1,117,217                               |
| ORCADES                  | 419         | 36,346              | 1,626,425                   | 1,133,261                               |
| ROS                      | 687         | 36,342              | 1,621,471                   | 1,131,184                               |
| <b>Replication Study</b> | <b>Size</b> | <b>Mapped Genes</b> | <b>SNPs Mapped to Genes</b> | <b>Independent SNPs Mapped to Genes</b> |
| Sydney MAS               | 887         | 36,370              | 2,402,745                   | 244,827                                 |
| WGHS                     | 3542        | 37,978              | 2,446,788                   | 274,512                                 |
| NHS-CGEM                 | 2066        | 36,370              | 2,401,155                   | 242,854                                 |
| NHS-GLAU                 | 179         | 36,370              | 2,399,007                   | 243,580                                 |
| NHS-KS                   | 80          | 36,370              | 2,390,963                   | 242,325                                 |
| NHS-T2D                  | 756         | 36,370              | 2,402,404                   | 243,998                                 |
| NHS-ENDO                 | 141         | 36,370              | 2,395,954                   | 242,932                                 |
| NHS-CHD                  | 358         | 36,370              | 2,400,863                   | 244,042                                 |

**Table S2: Sample size and the number of SNPs in the word list delayed recall GWAS from each discovery and replication cohort**

| <b>Discovery Study</b>   | <b>Size</b> | <b>Mapped Genes</b> | <b>SNPs Mapped to Genes</b> | <b>Independent SNPs Mapped to Genes</b> |
|--------------------------|-------------|---------------------|-----------------------------|-----------------------------------------|
| AGES                     | 2616        | 35,489              | 1,543,364                   | 1,096,628                               |
| ARIC                     | 9188        | 36,370              | 1,629,725                   | 989,308                                 |
| CHS                      | 334         | 35,917              | 1,497,718                   | 976,227                                 |
| ERF                      | 1267        | 36,370              | 1,629,276                   | 1,138,098                               |
| GENOA                    | 758         | 36,270              | 1,566,203                   | 1,102,863                               |
| HBCS                     | 888         | 36,056              | 1,557,853                   | 1,100,825                               |
| KORCULA                  | 472         | 36,347              | 1,621,910                   | 1,133,344                               |
| MAP                      | 751         | 36,342              | 1,621,490                   | 1,131,751                               |
| ROS                      | 687         | 36,342              | 1,621,471                   | 1,129,369                               |
| RS1                      | 2067        | 36,352              | 1,629,532                   | 1,137,296                               |
| RS2                      | 1533        | 36,353              | 1,628,710                   | 1,131,348                               |
| RS3                      | 1935        | 36,366              | 1,628,825                   | 1,136,731                               |
| SHIP                     | 1474        | 36,475              | 1,742,022                   | 1,129,014                               |
| SPLIT                    | 303         | 36,370              | 1,628,392                   | 1,141,061                               |
| TASCOG                   | 331         | 36,358              | 1,604,242                   | 1,126,345                               |
| <b>Replication Study</b> | <b>Size</b> | <b>Mapped Genes</b> | <b>SNPs Mapped to Genes</b> | <b>Independent SNPs Mapped to Genes</b> |
| Sydney MAS               | 880         | 36,370              | 2,402,745                   | 244,262                                 |
| WGHS                     | 3542        | 37,978              | 2,446,788                   | 274,347                                 |
| NHS-CGEM                 | 1773        | 36,370              | 2,400,711                   | 244,310                                 |
| NHS-GLAU                 | 166         | 36,370              | 2,398,566                   | 243,137                                 |
| NHS-KS                   | 76          | 36,370              | 2,390,073                   | 242,090                                 |
| NHS-T2D                  | 655         | 36,370              | 2,402,114                   | 244,131                                 |
| NHS-ENDO                 | 119         | 36,369              | 2,393,809                   | 242,911                                 |
| NHS-CHD                  | 307         | 36,370              | 2,400,354                   | 243,518                                 |

**Table S3: Tissue-specific relationships between delayed recall test (PAR-dr and WL-dr) summary SNP associations and eQTLs and meQTLs**

| Tissue               | Trait  | Summary GWAS                    | Beta (LogOR) | S.E. | Z     | raw_pVal  | perm_pVal |
|----------------------|--------|---------------------------------|--------------|------|-------|-----------|-----------|
| All tissues combined | PAR-dr | Discovery                       | 0.52         | 0.01 | 38.02 | 0         | <0.001    |
|                      |        | Joint Discovery and Replication | 0.41         | 0.01 | 42.52 | 0         | <0.001    |
|                      | WL-dr  | Discovery                       | 0.37         | 0.02 | 23.62 | 2.50E-123 | <0.001    |
|                      |        | Joint Discovery and Replication | 0.36         | 0.01 | 38.70 | 0         | <0.001    |
| adiposeSubcut        | PAR-dr | Discovery                       | 0.55         | 0.02 | 27.30 | 4.74E-164 | <0.001    |
|                      |        | Joint Discovery and Replication | 0.45         | 0.01 | 31.30 | 5.06E-215 | <0.001    |
|                      | WL-dr  | Discovery                       | 0.42         | 0.02 | 18.60 | 3.45E-77  | <0.001    |
|                      |        | Joint Discovery and Replication | 0.40         | 0.01 | 28.28 | 6.99E-176 | <0.001    |
| adiposeVisceral      | PAR-dr | Discovery                       | 0.56         | 0.02 | 25.22 | 2.52E-140 | <0.001    |
|                      |        | Joint Discovery and Replication | 0.45         | 0.02 | 28.57 | 1.51E-179 | <0.001    |
|                      | WL-dr  | Discovery                       | 0.44         | 0.02 | 17.88 | 1.80E-71  | <0.001    |
|                      |        | Joint Discovery and Replication | 0.41         | 0.02 | 26.45 | 3.53E-154 | <0.001    |
| adrenalGland         | PAR-dr | Discovery                       | 0.58         | 0.02 | 24.96 | 1.59E-137 | <0.001    |
|                      |        | Joint Discovery and Replication | 0.48         | 0.02 | 28.71 | 3.07E-181 | <0.001    |
|                      | WL-dr  | Discovery                       | 0.46         | 0.03 | 17.87 | 1.92E-71  | <0.001    |
|                      |        | Joint Discovery and Replication | 0.45         | 0.02 | 27.85 | 1.08E-170 | <0.001    |
| arteryAorta          | PAR-dr | Discovery                       | 0.57         | 0.02 | 27.10 | 9.06E-162 | <0.001    |
|                      |        | Joint Discovery and Replication | 0.46         | 0.02 | 30.60 | 1.39E-205 | <0.001    |
|                      | WL-dr  | Discovery                       | 0.43         | 0.02 | 18.18 | 6.82E-74  | <0.001    |
|                      |        | Joint Discovery and Replication | 0.43         | 0.01 | 29.08 | 6.19E-186 | <0.001    |
| arteryCoronary       | PAR-dr | Discovery                       | 0.59         | 0.02 | 25.71 | 9.63E-146 | <0.001    |
|                      |        | Joint Discovery and Replication | 0.49         | 0.02 | 29.87 | 4.32E-196 | <0.001    |
|                      | WL-dr  | Discovery                       | 0.45         | 0.03 | 17.66 | 9.21E-70  | <0.001    |
|                      |        | Joint Discovery and Replication | 0.42         | 0.02 | 25.98 | 9.11E-149 | <0.001    |
| arteryTibial         |        | Discovery                       | 0.58         | 0.02 | 28.20 | 6.26E-175 | <0.001    |

|                  |        |                                 |      |      |       |           |        |
|------------------|--------|---------------------------------|------|------|-------|-----------|--------|
|                  | PAR-dr | Joint Discovery and Replication | 0.46 | 0.01 | 31.33 | 1.70E-215 | <0.001 |
|                  | WL-dr  | Discovery                       | 0.40 | 0.02 | 17.32 | 3.34E-67  | <0.001 |
|                  |        | Joint Discovery and Replication | 0.40 | 0.01 | 28.14 | 2.90E-174 | <0.001 |
| brainAnCinCortex | PAR-dr | Discovery                       | 0.61 | 0.03 | 23.02 | 3.25E-117 | <0.001 |
|                  |        | Joint Discovery and Replication | 0.51 | 0.02 | 26.93 | 1.07E-159 | <0.001 |
|                  | WL-dr  | Discovery                       | 0.48 | 0.03 | 16.10 | 2.61E-58  | <0.001 |
|                  |        | Joint Discovery and Replication | 0.44 | 0.02 | 23.48 | 7.19E-122 | <0.001 |
| brainCaudate     | PAR-dr | Discovery                       | 0.60 | 0.02 | 24.72 | 6.33E-135 | <0.001 |
|                  |        | Joint Discovery and Replication | 0.50 | 0.02 | 28.78 | 3.90E-182 | <0.001 |
|                  | WL-dr  | Discovery                       | 0.43 | 0.03 | 15.60 | 7.87E-55  | <0.001 |
|                  |        | Joint Discovery and Replication | 0.43 | 0.02 | 25.33 | 1.41E-141 | <0.001 |
| brainCerebelHemi | PAR-dr | Discovery                       | 0.62 | 0.02 | 25.18 | 6.48E-140 | <0.001 |
|                  |        | Joint Discovery and Replication | 0.51 | 0.02 | 28.61 | 5.29E-180 | <0.001 |
|                  | WL-dr  | Discovery                       | 0.46 | 0.03 | 16.54 | 2.05E-61  | <0.001 |
|                  |        | Joint Discovery and Replication | 0.44 | 0.02 | 25.47 | 4.27E-143 | <0.001 |
| brainCerebellum  | PAR-dr | Discovery                       | 0.60 | 0.02 | 25.36 | 6.54E-142 | <0.001 |
|                  |        | Joint Discovery and Replication | 0.51 | 0.02 | 30.10 | 5.16E-199 | <0.001 |
|                  | WL-dr  | Discovery                       | 0.44 | 0.03 | 16.50 | 3.55E-61  | <0.001 |
|                  |        | Joint Discovery and Replication | 0.43 | 0.02 | 25.56 | 4.61E-144 | <0.001 |
| brainCortex      | PAR-dr | Discovery                       | 0.59 | 0.02 | 24.47 | 3.03E-132 | <0.001 |
|                  |        | Joint Discovery and Replication | 0.49 | 0.02 | 28.12 | 5.84E-174 | <0.001 |
|                  | WL-dr  | Discovery                       | 0.44 | 0.03 | 15.72 | 1.08E-55  | <0.001 |
|                  |        | Joint Discovery and Replication | 0.42 | 0.02 | 24.68 | 1.64E-134 | <0.001 |
| brainFrontCortex | PAR-dr | Discovery                       | 0.60 | 0.03 | 23.91 | 2.28E-126 | <0.001 |
|                  |        | Joint Discovery and Replication | 0.50 | 0.02 | 27.17 | 1.39E-162 | <0.001 |
|                  | WL-dr  | Discovery                       | 0.47 | 0.03 | 16.52 | 2.69E-61  | <0.001 |
|                  |        | Joint Discovery and Replication | 0.43 | 0.02 | 23.93 | 1.50E-126 | <0.001 |
| brainHippocampus | PAR-dr | Discovery                       | 0.61 | 0.03 | 23.27 | 9.42E-120 | <0.001 |
|                  |        | Joint Discovery and Replication | 0.52 | 0.02 | 27.89 | 3.83E-171 | <0.001 |
|                  |        | Discovery                       | 0.45 | 0.03 | 15.04 | 4.31E-51  | <0.001 |

|                    |        |                                 |      |      |       |           |        |
|--------------------|--------|---------------------------------|------|------|-------|-----------|--------|
|                    | WL-dr  | Joint Discovery and Replication | 0.44 | 0.02 | 23.88 | 4.85E-126 | <0.001 |
| brainHypothalamus  | PAR-dr | Discovery                       | 0.61 | 0.03 | 23.59 | 4.40E-123 | <0.001 |
|                    |        | Joint Discovery and Replication | 0.52 | 0.02 | 27.47 | 4.59E-166 | <0.001 |
|                    | WL-dr  | Discovery                       | 0.47 | 0.03 | 15.93 | 3.94E-57  | <0.001 |
|                    |        | Joint Discovery and Replication | 0.43 | 0.02 | 23.27 | 8.94E-120 | <0.001 |
| brainNucAccumbens  | PAR-dr | Discovery                       | 0.59 | 0.03 | 23.40 | 4.33E-121 | <0.001 |
|                    |        | Joint Discovery and Replication | 0.50 | 0.02 | 27.96 | 5.02E-172 | <0.001 |
|                    | WL-dr  | Discovery                       | 0.44 | 0.03 | 15.37 | 2.43E-53  | <0.001 |
|                    |        | Joint Discovery and Replication | 0.43 | 0.02 | 24.46 | 3.63E-132 | <0.001 |
| brainPutamen       | PAR-dr | Discovery                       | 0.61 | 0.03 | 23.71 | 3.13E-124 | <0.001 |
|                    |        | Joint Discovery and Replication | 0.50 | 0.02 | 27.28 | 6.65E-164 | <0.001 |
|                    | WL-dr  | Discovery                       | 0.45 | 0.03 | 15.65 | 3.34E-55  | <0.001 |
|                    |        | Joint Discovery and Replication | 0.44 | 0.02 | 24.49 | 2.13E-132 | <0.001 |
| breastMamTissue    | PAR-dr | Discovery                       | 0.56 | 0.02 | 25.58 | 2.38E-144 | <0.001 |
|                    |        | Joint Discovery and Replication | 0.46 | 0.02 | 29.19 | 2.73E-187 | <0.001 |
|                    | WL-dr  | Discovery                       | 0.43 | 0.02 | 17.52 | 9.65E-69  | <0.001 |
|                    |        | Joint Discovery and Replication | 0.40 | 0.02 | 26.00 | 4.91E-149 | <0.001 |
| xformedlymphocytes | PAR-dr | Discovery                       | 0.58 | 0.03 | 22.21 | 2.58E-109 | <0.001 |
|                    |        | Joint Discovery and Replication | 0.50 | 0.02 | 26.76 | 9.33E-158 | <0.001 |
|                    | WL-dr  | Discovery                       | 0.47 | 0.03 | 16.38 | 2.45E-60  | <0.001 |
|                    |        | Joint Discovery and Replication | 0.42 | 0.02 | 23.37 | 8.00E-121 | <0.001 |
| xformedfibroblasts | PAR-dr | Discovery                       | 0.55 | 0.02 | 25.17 | 8.00E-140 | <0.001 |
|                    |        | Joint Discovery and Replication | 0.45 | 0.02 | 28.66 | 1.33E-180 | <0.001 |
|                    | WL-dr  | Discovery                       | 0.45 | 0.02 | 18.38 | 1.82E-75  | <0.001 |
|                    |        | Joint Discovery and Replication | 0.40 | 0.02 | 26.34 | 6.40E-153 | <0.001 |
| colonSigmoid       | PAR-dr | Discovery                       | 0.58 | 0.02 | 25.05 | 1.56E-138 | <0.001 |
|                    |        | Joint Discovery and Replication | 0.50 | 0.02 | 30.38 | 8.85E-203 | <0.001 |
|                    | WL-dr  | Discovery                       | 0.46 | 0.03 | 18.06 | 6.57E-73  | <0.001 |
|                    |        | Joint Discovery and Replication | 0.44 | 0.02 | 27.58 | 2.09E-167 | <0.001 |
| colonTransverse    |        | Discovery                       | 0.58 | 0.02 | 25.70 | 1.24E-145 | <0.001 |

|                   |        |                                 |      |      |       |           |        |
|-------------------|--------|---------------------------------|------|------|-------|-----------|--------|
|                   | PAR-dr | Joint Discovery and Replication | 0.46 | 0.02 | 28.22 | 3.47E-175 | <0.001 |
|                   | WL-dr  | Discovery                       | 0.42 | 0.03 | 16.72 | 9.24E-63  | <0.001 |
|                   |        | Joint Discovery and Replication | 0.42 | 0.02 | 26.75 | 1.13E-157 | <0.001 |
| esophagusJunction | PAR-dr | Discovery                       | 0.58 | 0.02 | 25.52 | 1.10E-143 | <0.001 |
|                   |        | Joint Discovery and Replication | 0.49 | 0.02 | 30.05 | 2.30E-198 | <0.001 |
|                   | WL-dr  | Discovery                       | 0.45 | 0.03 | 17.49 | 1.63E-68  | <0.001 |
|                   |        | Joint Discovery and Replication | 0.41 | 0.02 | 25.72 | 6.21E-146 | <0.001 |
| esophagusMucosa   | PAR-dr | Discovery                       | 0.58 | 0.02 | 27.44 | 9.54E-166 | <0.001 |
|                   |        | Joint Discovery and Replication | 0.46 | 0.02 | 30.42 | 3.38E-203 | <0.001 |
|                   | WL-dr  | Discovery                       | 0.44 | 0.02 | 18.69 | 5.63E-78  | <0.001 |
|                   |        | Joint Discovery and Replication | 0.41 | 0.01 | 27.86 | 8.07E-171 | <0.001 |
| esophagusMuscular | PAR-dr | Discovery                       | 0.56 | 0.02 | 27.09 | 1.16E-161 | <0.001 |
|                   |        | Joint Discovery and Replication | 0.47 | 0.01 | 31.73 | 6.35E-221 | <0.001 |
|                   | WL-dr  | Discovery                       | 0.44 | 0.02 | 19.37 | 1.26E-83  | <0.001 |
|                   |        | Joint Discovery and Replication | 0.41 | 0.01 | 28.70 | 4.32E-181 | <0.001 |
| heartAtrialAppend | PAR-dr | Discovery                       | 0.57 | 0.02 | 25.51 | 1.62E-143 | <0.001 |
|                   |        | Joint Discovery and Replication | 0.47 | 0.02 | 28.88 | 1.88E-183 | <0.001 |
|                   | WL-dr  | Discovery                       | 0.45 | 0.02 | 18.29 | 9.52E-75  | <0.001 |
|                   |        | Joint Discovery and Replication | 0.42 | 0.02 | 27.01 | 1.01E-160 | <0.001 |
| heartLeftVentricl | PAR-dr | Discovery                       | 0.57 | 0.02 | 24.89 | 9.56E-137 | <0.001 |
|                   |        | Joint Discovery and Replication | 0.47 | 0.02 | 28.40 | 2.15E-177 | <0.001 |
|                   | WL-dr  | Discovery                       | 0.44 | 0.03 | 17.51 | 1.13E-68  | <0.001 |
|                   |        | Joint Discovery and Replication | 0.41 | 0.02 | 26.03 | 2.35E-149 | <0.001 |
| Liver             | PAR-dr | Discovery                       | 0.59 | 0.03 | 21.82 | 1.35E-105 | <0.001 |
|                   |        | Joint Discovery and Replication | 0.50 | 0.02 | 25.93 | 2.74E-148 | <0.001 |
|                   | WL-dr  | Discovery                       | 0.47 | 0.03 | 15.93 | 3.78E-57  | <0.001 |
|                   |        | Joint Discovery and Replication | 0.45 | 0.02 | 24.42 | 1.14E-131 | <0.001 |
| Lung              | PAR-dr | Discovery                       | 0.55 | 0.02 | 25.95 | 1.60E-148 | <0.001 |
|                   |        | Joint Discovery and Replication | 0.45 | 0.02 | 29.93 | 9.08E-197 | <0.001 |
|                   |        | Discovery                       | 0.43 | 0.02 | 18.49 | 2.68E-76  | <0.001 |



|                |        |                                 |      |      |       |           |        |
|----------------|--------|---------------------------------|------|------|-------|-----------|--------|
|                | WL-dr  | Joint Discovery and Replication | 0.40 | 0.01 | 27.87 | 5.37E-171 | <0.001 |
| muscleSkeletal | PAR-dr | Discovery                       | 0.56 | 0.02 | 24.98 | 9.93E-138 | <0.001 |
|                |        | Joint Discovery and Replication | 0.46 | 0.02 | 28.50 | 1.13E-178 | <0.001 |
|                | WL-dr  | Discovery                       | 0.42 | 0.03 | 16.72 | 9.58E-63  | <0.001 |
|                |        | Joint Discovery and Replication | 0.40 | 0.02 | 25.46 | 5.27E-143 | <0.001 |
| nerveTibial    | PAR-dr | Discovery                       | 0.58 | 0.02 | 29.71 | 6.23E-194 | <0.001 |
|                |        | Joint Discovery and Replication | 0.47 | 0.01 | 33.20 | 1.25E-241 | <0.001 |
|                | WL-dr  | Discovery                       | 0.42 | 0.02 | 19.05 | 7.16E-81  | <0.001 |
|                |        | Joint Discovery and Replication | 0.41 | 0.01 | 29.49 | 4.11E-191 | <0.001 |
| Ovary          | PAR-dr | Discovery                       | 0.59 | 0.03 | 23.50 | 3.82E-122 | <0.001 |
|                |        | Joint Discovery and Replication | 0.51 | 0.02 | 28.31 | 2.73E-176 | <0.001 |
|                | WL-dr  | Discovery                       | 0.47 | 0.03 | 17.08 | 1.93E-65  | <0.001 |
|                |        | Joint Discovery and Replication | 0.44 | 0.02 | 25.54 | 6.48E-144 | <0.001 |
| Pancreas       | PAR-dr | Discovery                       | 0.56 | 0.02 | 24.72 | 7.33E-135 | <0.001 |
|                |        | Joint Discovery and Replication | 0.47 | 0.02 | 28.55 | 2.97E-179 | <0.001 |
|                | WL-dr  | Discovery                       | 0.44 | 0.03 | 17.40 | 8.80E-68  | <0.001 |
|                |        | Joint Discovery and Replication | 0.41 | 0.02 | 25.90 | 5.90E-148 | <0.001 |
| Pituitary      | PAR-dr | Discovery                       | 0.62 | 0.02 | 25.53 | 1.02E-143 | <0.001 |
|                |        | Joint Discovery and Replication | 0.52 | 0.02 | 29.49 | 3.80E-191 | <0.001 |
|                | WL-dr  | Discovery                       | 0.45 | 0.03 | 16.25 | 2.24E-59  | <0.001 |
|                |        | Joint Discovery and Replication | 0.44 | 0.02 | 25.61 | 1.31E-144 | <0.001 |
| Prostate       | PAR-dr | Discovery                       | 0.61 | 0.02 | 25.17 | 7.54E-140 | <0.001 |
|                |        | Joint Discovery and Replication | 0.50 | 0.02 | 28.73 | 1.82E-181 | <0.001 |
|                | WL-dr  | Discovery                       | 0.48 | 0.03 | 17.66 | 8.37E-70  | <0.001 |
|                |        | Joint Discovery and Replication | 0.44 | 0.02 | 25.52 | 1.16E-143 | <0.001 |
| skinNotExposed | PAR-dr | Discovery                       | 0.57 | 0.02 | 26.32 | 1.12E-152 | <0.001 |
|                |        | Joint Discovery and Replication | 0.46 | 0.02 | 29.63 | 6.50E-193 | <0.001 |
|                | WL-dr  | Discovery                       | 0.45 | 0.02 | 18.62 | 2.33E-77  | <0.001 |
|                |        | Joint Discovery and Replication | 0.42 | 0.01 | 27.92 | 1.65E-171 | <0.001 |
| skinExposed    |        | Discovery                       | 0.57 | 0.02 | 27.47 | 3.59E-166 | <0.001 |

|                |        |                                 |      |      |       |           |        |
|----------------|--------|---------------------------------|------|------|-------|-----------|--------|
|                | PAR-dr | Joint Discovery and Replication | 0.45 | 0.01 | 30.76 | 9.18E-208 | <0.001 |
|                | WL-dr  | Discovery                       | 0.44 | 0.02 | 19.05 | 6.29E-81  | <0.001 |
|                |        | Joint Discovery and Replication | 0.41 | 0.01 | 28.26 | 9.56E-176 | <0.001 |
| smallIntestine | PAR-dr | Discovery                       | 0.60 | 0.03 | 23.89 | 4.37E-126 | <0.001 |
|                |        | Joint Discovery and Replication | 0.51 | 0.02 | 28.32 | 2.04E-176 | <0.001 |
|                | WL-dr  | Discovery                       | 0.48 | 0.03 | 17.25 | 1.13E-66  | <0.001 |
|                |        | Joint Discovery and Replication | 0.44 | 0.02 | 25.30 | 2.82E-141 | <0.001 |
| Spleen         | PAR-dr | Discovery                       | 0.58 | 0.02 | 24.16 | 5.77E-129 | <0.001 |
|                |        | Joint Discovery and Replication | 0.48 | 0.02 | 28.33 | 1.48E-176 | <0.001 |
|                | WL-dr  | Discovery                       | 0.45 | 0.03 | 17.06 | 2.83E-65  | <0.001 |
|                |        | Joint Discovery and Replication | 0.45 | 0.02 | 27.25 | 1.90E-163 | <0.001 |
| Stomach        | PAR-dr | Discovery                       | 0.58 | 0.02 | 25.54 | 6.91E-144 | <0.001 |
|                |        | Joint Discovery and Replication | 0.47 | 0.02 | 28.90 | 1.28E-183 | <0.001 |
|                | WL-dr  | Discovery                       | 0.44 | 0.03 | 17.15 | 6.23E-66  | <0.001 |
|                |        | Joint Discovery and Replication | 0.41 | 0.02 | 25.51 | 1.71E-143 | <0.001 |
| Testis         | PAR-dr | Discovery                       | 0.57 | 0.02 | 25.18 | 7.08E-140 | <0.001 |
|                |        | Joint Discovery and Replication | 0.47 | 0.02 | 28.94 | 3.84E-184 | <0.001 |
|                | WL-dr  | Discovery                       | 0.42 | 0.03 | 16.45 | 7.74E-61  | <0.001 |
|                |        | Joint Discovery and Replication | 0.40 | 0.02 | 25.70 | 1.25E-145 | <0.001 |
| Thyroid        | PAR-dr | Discovery                       | 0.55 | 0.02 | 27.49 | 2.57E-166 | <0.001 |
|                |        | Joint Discovery and Replication | 0.45 | 0.01 | 31.29 | 6.03E-215 | <0.001 |
|                | WL-dr  | Discovery                       | 0.42 | 0.02 | 18.91 | 9.05E-80  | <0.001 |
|                |        | Joint Discovery and Replication | 0.40 | 0.01 | 28.89 | 1.40E-183 | <0.001 |
| Uterus         | PAR-dr | Discovery                       | 0.62 | 0.03 | 23.90 | 3.00E-126 | <0.001 |
|                |        | Joint Discovery and Replication | 0.51 | 0.02 | 27.36 | 9.16E-165 | <0.001 |
|                | WL-dr  | Discovery                       | 0.49 | 0.03 | 17.00 | 7.64E-65  | <0.001 |
|                |        | Joint Discovery and Replication | 0.45 | 0.02 | 24.58 | 1.89E-133 | <0.001 |
| Vagina         | PAR-dr | Discovery                       | 0.61 | 0.03 | 23.42 | 2.74E-121 | <0.001 |
|                |        | Joint Discovery and Replication | 0.51 | 0.02 | 27.58 | 2.20E-167 | <0.001 |

|                                  |        |                                 |      |      |       |           |        |
|----------------------------------|--------|---------------------------------|------|------|-------|-----------|--------|
|                                  | WL-dr  | Discovery                       | 0.48 | 0.03 | 16.62 | 5.17E-62  | <0.001 |
|                                  |        | Joint Discovery and Replication | 0.44 | 0.02 | 24.15 | 7.87E-129 | <0.001 |
| wholeBlood                       | PAR-dr | Discovery                       | 0.55 | 0.02 | 22.24 | 1.42E-109 | <0.001 |
|                                  |        | Joint Discovery and Replication | 0.44 | 0.02 | 24.44 | 6.80E-132 | <0.001 |
|                                  | WL-dr  | Discovery                       | 0.43 | 0.03 | 15.47 | 5.89E-54  | <0.001 |
|                                  |        | Joint Discovery and Replication | 0.39 | 0.02 | 22.72 | 2.81E-114 | <0.001 |
| brainHippocampus2017             | PAR-dr | Discovery                       | 0.76 | 0.10 | 7.66  | 1.91E-14  | <0.001 |
|                                  |        | Joint Discovery and Replication | 0.60 | 0.07 | 8.59  | 8.42E-18  | <0.001 |
|                                  | WL-dr  | Discovery                       | 0.41 | 0.12 | 3.25  | 0.00114   | 0.034  |
|                                  |        | Joint Discovery and Replication | 0.41 | 0.07 | 5.47  | 4.42E-08  | <0.001 |
| brainHippocampus2017<br>methyQTL | PAR-dr | Discovery                       | 0.57 | 0.02 | 28.60 | 6.96E-180 | <0.001 |
|                                  |        | Joint Discovery and Replication | 0.47 | 0.01 | 33.94 | 1.50E-252 | <0.001 |
|                                  | WL-dr  | Discovery                       | 0.45 | 0.02 | 21.02 | 4.32E-98  | <0.001 |
|                                  |        | Joint Discovery and Replication | 0.42 | 0.01 | 31.68 | 2.67E-220 | <0.001 |



**Table S4: Relationship Between Delayed Recall Summary Gene Associations and Transcription Factor Genes**

| Transcription Factor Gene | Trait  | Summary GWAS | Beta (LogOR) | S.E. | Z     | raw_pVal | perm_pVal |
|---------------------------|--------|--------------|--------------|------|-------|----------|-----------|
| AR                        | PAR-dr | Discovery    | 0.06         | 0.2  | 0.32  | 0.749    | 1         |
|                           |        | Joint        | 0.14         | 0.2  | 0.73  | 0.466    | 1         |
|                           | WL-dr  | Discovery    | -0.04        | 0.21 | -0.19 | 0.846    | 1         |
|                           |        | Joint        | 0.47         | 0.17 | 2.8   | 0.00513  | 0.384     |
| BACH1                     | PAR-dr | Discovery    | 0.45         | 0.24 | 1.83  | 0.067    | 0.994     |
|                           |        | Joint        | 0.25         | 0.27 | 0.93  | 0.354    | 1         |
|                           | WL-dr  | Discovery    | -0.69        | 0.39 | -1.76 | 0.0782   | 0.997     |
|                           |        | Joint        | 0.41         | 0.25 | 1.64  | 0.101    | 1         |
| CEBPA                     | PAR-dr | Discovery    | 0.22         | 0.03 | 8.23  | 1.93e-16 | <0.001    |
|                           |        | Joint        | 0.53         | 0.03 | 20.02 | 3.57e-89 | <0.001    |
|                           | WL-dr  | Discovery    | 0.09         | 0.03 | 3.21  | 0.00133  | 0.18      |
|                           |        | Joint        | 0.57         | 0.03 | 21.77 | 4.3e-105 | <0.001    |
| CTCF                      | PAR-dr | Discovery    | 0.17         | 0.03 | 6.91  | 4.79e-12 | <0.001    |
|                           |        | Joint        | 0.5          | 0.03 | 19.62 | 1.02e-85 | <0.001    |
|                           | WL-dr  | Discovery    | 0.16         | 0.03 | 6.26  | 3.86e-10 | <0.001    |
|                           |        | Joint        | 0.6          | 0.03 | 23.05 | 1.6e-117 | <0.001    |
| E2F1                      | PAR-dr | Discovery    | 0.2          | 0.03 | 6.08  | 1.18e-09 | <0.001    |
|                           |        | Joint        | 0.47         | 0.03 | 15.15 | 7.7e-52  | <0.001    |
|                           | WL-dr  | Discovery    | 0.18         | 0.03 | 5.3   | 1.14e-07 | 0.001     |
|                           |        | Joint        | 0.54         | 0.03 | 17.47 | 2.56e-68 | <0.001    |
| E2F4                      | PAR-dr | Discovery    | 0.12         | 0.03 | 3.59  | 0.00033  | 0.076     |
|                           |        | Joint        | 0.32         | 0.03 | 10.39 | 2.73e-25 | <0.001    |
|                           | WL-dr  | Discovery    | 0.12         | 0.03 | 3.82  | 0.000134 | 0.052     |
|                           |        | Joint        | 0.38         | 0.03 | 12.6  | 2.03e-3  | <0.001    |
| EGR1                      | PAR-dr | Discovery    | 0.12         | 0.03 | 4.49  | 7.17e-06 | 0.007     |
|                           |        | Joint        | 0.39         | 0.03 | 15.04 | 3.72e-51 | <0.001    |
|                           | WL-dr  | Discovery    | 0.16         | 0.03 | 6     | 1.93e-09 | <0.001    |
|                           |        | Joint        | 0.54         | 0.03 | 20.52 | 1.49e-93 | <0.001    |
| EPAS1                     | PAR-dr | Discovery    | 0.24         | 0.13 | 1.78  | 0.0756   | 0.997     |
|                           |        | Joint        | 0.37         | 0.13 | 2.93  | 0.00341  | 0.364     |
|                           | WL-dr  | Discovery    | 0.4          | 0.13 | 3.21  | 0.00134  | 0.18      |
|                           |        | Joint        | 0.63         | 0.11 | 5.68  | 1.31e-08 | 0.001     |
| ESR1                      | PAR-dr | Discovery    | 0.21         | 0.03 | 6.81  | 9.56e-12 | <0.001    |
|                           |        | Joint        | 0.46         | 0.03 | 15.66 | 2.88e-55 | <0.001    |
|                           | WL-dr  | Discovery    | 0.13         | 0.03 | 4.24  | 2.25e-05 | 0.02      |
|                           |        | Joint        | 0.56         | 0.03 | 19.31 | 4.79e-83 | <0.001    |
| ETS1                      | PAR-dr | Discovery    | 0.12         | 0.03 | 4.19  | 2.82e-05 | 0.016     |
|                           |        | Joint        | 0.36         | 0.03 | 13.39 | 7.35e-41 | <0.001    |
|                           |        | Discovery    | 0.09         | 0.03 | 3.33  | 0.000881 | 0.143     |

|       |        |           |       |      |       |           |        |
|-------|--------|-----------|-------|------|-------|-----------|--------|
|       | WL-dr  | Joint     | 0.41  | 0.03 | 15.22 | 2.45e-52  | <0.001 |
| FOS   | PAR-dr | Discovery | 0.21  | 0.03 | 7.62  | 2.56e-14  | <0.001 |
|       |        | Joint     | 0.46  | 0.03 | 16.89 | 5.5e-64   | <0.001 |
|       | WL-dr  | Discovery | 0.13  | 0.03 | 4.58  | 4.73e-06  | 0.01   |
|       |        | Joint     | 0.52  | 0.03 | 18.98 | 2.54e-80  | <0.001 |
| FOXA1 | PAR-dr | Discovery | 0.23  | 0.03 | 8.88  | 6.73e-19  | <0.001 |
|       |        | Joint     | 0.56  | 0.03 | 21.27 | 2.15e-100 | <0.001 |
|       | WL-dr  | Discovery | 0.15  | 0.03 | 5.51  | 3.49e-08  | 0.001  |
|       |        | Joint     | 0.65  | 0.03 | 24.54 | 5.77e-133 | <0.001 |
| FOXP1 | PAR-dr | Discovery | 0.17  | 0.04 | 4.09  | 4.4e-05   | 0.023  |
|       |        | Joint     | 0.38  | 0.04 | 9.52  | 1.73e-21  | <0.001 |
|       | WL-dr  | Discovery | 0.07  | 0.04 | 1.57  | 0.117     | 1      |
|       |        | Joint     | 0.33  | 0.04 | 8.29  | 1.16e-16  | <0.001 |
| GATA2 | PAR-dr | Discovery | 0.27  | 0.03 | 8.31  | 9.63e-17  | <0.001 |
|       |        | Joint     | 0.56  | 0.03 | 18.63 | 1.84e-77  | <0.001 |
|       | WL-dr  | Discovery | 0.13  | 0.03 | 4.05  | 5.21e-05  | 0.036  |
|       |        | Joint     | 0.6   | 0.03 | 19.94 | 1.73e-88  | <0.001 |
| GATA3 | PAR-dr | Discovery | 0.2   | 0.03 | 6.95  | 3.65e-12  | <0.001 |
|       |        | Joint     | 0.53  | 0.03 | 18.76 | 1.59e-78  | <0.001 |
|       | WL-dr  | Discovery | 0.1   | 0.03 | 3.51  | 0.00045   | 0.101  |
|       |        | Joint     | 0.6   | 0.03 | 21.38 | 2.03e-101 | <0.001 |
| HIF1A | PAR-dr | Discovery | 0.27  | 0.08 | 3.31  | 0.000921  | 0.135  |
|       |        | Joint     | 0.44  | 0.08 | 5.7   | 1.17e-08  | <0.001 |
|       | WL-dr  | Discovery | 0.13  | 0.09 | 1.46  | 0.144     | 1      |
|       |        | Joint     | 0.36  | 0.08 | 4.59  | 4.38e-06  | 0.005  |
| HNF1A | PAR-dr | Discovery | 0.07  | 0.5  | 0.14  | 0.89      | 1      |
|       |        | Joint     | 0.53  | 0.4  | 1.33  | 0.184     | 1      |
|       | WL-dr  | Discovery | 0.76  | 0.35 | 2.15  | 0.0316    | 0.921  |
|       |        | Joint     | 0.43  | 0.42 | 1.02  | 0.306     | 1      |
| HNF4A | PAR-dr | Discovery | 0.19  | 0.03 | 7.03  | 2.03e-12  | <0.001 |
|       |        | Joint     | 0.46  | 0.03 | 17.18 | 3.99e-66  | <0.001 |
|       | WL-dr  | Discovery | 0.12  | 0.03 | 4.31  | 1.64e-05  | 0.017  |
|       |        | Joint     | 0.52  | 0.03 | 19.58 | 2.33e-85  | <0.001 |
| IGF1R | PAR-dr | Discovery | 0.2   | 0.22 | 0.91  | 0.364     | 1      |
|       |        | Joint     | 0.31  | 0.21 | 1.48  | 0.139     | 1      |
|       | WL-dr  | Discovery | 0.07  | 0.23 | 0.32  | 0.749     | 1      |
|       |        | Joint     | 0.23  | 0.22 | 1.07  | 0.286     | 1      |
| JUN   | PAR-dr | Discovery | -0.87 | 0.82 | -1.06 | 0.289     | 1      |
|       |        | Joint     | 0.03  | 0.59 | 0.06  | 0.955     | 1      |
|       | WL-dr  | Discovery | 0.23  | 0.54 | 0.44  | 0.661     | 1      |
|       |        | Joint     | 0.39  | 0.5  | 0.79  | 0.432     | 1      |
| MITF  |        | Discovery | 0.19  | 0.03 | 5.85  | 4.91e-09  | <0.001 |

|         |        |           |       |      |       |           |        |
|---------|--------|-----------|-------|------|-------|-----------|--------|
|         | PAR-dr | Joint     | 0.46  | 0.03 | 15.32 | 6.07e-53  | <0.001 |
|         | WL-dr  | Discovery | 0.11  | 0.03 | 3.31  | 0.000931  | 0.146  |
|         |        | Joint     | 0.52  | 0.03 | 17.21 | 2.4e-66   | <0.001 |
| NFE2L2  | PAR-dr | Discovery | 0.49  | 0.53 | 0.92  | 0.357     | 1      |
|         |        | Joint     | -0.36 | 0.77 | -0.46 | 0.642     | 1      |
|         | WL-dr  | Discovery | 0.15  | 0.62 | 0.24  | 0.809     | 1      |
|         |        | Joint     | -0.44 | 0.79 | -0.55 | 0.58      | 1      |
| PRDM14  | PAR-dr | Discovery | 0.23  | 0.04 | 6.04  | 1.52e-09  | <0.001 |
|         |        | Joint     | 0.46  | 0.04 | 12.98 | 1.68e-38  | <0.001 |
|         | WL-dr  | Discovery | 0.17  | 0.04 | 4.42  | 1.01e-05  | 0.012  |
|         |        | Joint     | 0.6   | 0.03 | 17.26 | 1.02e-66  | <0.001 |
| RARA    | PAR-dr | Discovery | -0.68 | 0.47 | -1.44 | 0.151     | 1      |
|         |        | Joint     | -1.01 | 0.52 | -1.93 | 0.0531    | 0.983  |
|         | WL-dr  | Discovery | 0.11  | 0.36 | 0.3   | 0.762     | 1      |
|         |        | Joint     | -0.39 | 0.44 | -0.88 | 0.377     | 1      |
| RB1     | PAR-dr | Discovery | 0.1   | 0.03 | 3.37  | 0.000741  | 0.115  |
|         |        | Joint     | 0.38  | 0.03 | 13.54 | 9.29e-42  | <0.001 |
|         | WL-dr  | Discovery | 0.13  | 0.03 | 4.52  | 6.24e-06  | 0.011  |
|         |        | Joint     | 0.47  | 0.03 | 16.74 | 6.33e-63  | <0.001 |
| RBL2    | PAR-dr | Discovery | 0.18  | 0.03 | 6.92  | 4.38e-12  | <0.001 |
|         |        | Joint     | 0.48  | 0.03 | 18.4  | 1.42e-75  | <0.001 |
|         | WL-dr  | Discovery | 0.11  | 0.03 | 4.13  | 3.62e-05  | 0.03   |
|         |        | Joint     | 0.49  | 0.03 | 18.74 | 2.56e-78  | <0.001 |
| REST    | PAR-dr | Discovery | 0.12  | 0.08 | 1.57  | 0.115     | 1      |
|         |        | Joint     | 0.42  | 0.07 | 6.02  | 1.72e-09  | <0.001 |
|         | WL-dr  | Discovery | 0.24  | 0.07 | 3.22  | 0.00128   | 0.172  |
|         |        | Joint     | 0.53  | 0.07 | 8.05  | 8.5e-16   | <0.001 |
| RUNX1   | PAR-dr | Discovery | 0.29  | 0.04 | 6.51  | 7.69e-11  | <0.001 |
|         |        | Joint     | 0.57  | 0.04 | 14.06 | 6.79e-45  | <0.001 |
|         | WL-dr  | Discovery | 0.2   | 0.05 | 4.45  | 8.77e-06  | 0.012  |
|         |        | Joint     | 0.57  | 0.04 | 14.11 | 3.22e-45  | <0.001 |
| SMARCA4 | PAR-dr | Discovery | 0.19  | 0.03 | 7.29  | 3.16e-13  | <0.001 |
|         |        | Joint     | 0.51  | 0.03 | 19.94 | 1.99e-88  | <0.001 |
|         | WL-dr  | Discovery | 0.09  | 0.03 | 3.64  | 0.000272  | 0.071  |
|         |        | Joint     | 0.58  | 0.03 | 22.51 | 3.17e-112 | <0.001 |
| SOX2    | PAR-dr | Discovery | 0.32  | 0.04 | 8.28  | 1.25e-16  | <0.001 |
|         |        | Joint     | 0.59  | 0.04 | 16.32 | 7.21e-60  | <0.001 |
|         | WL-dr  | Discovery | 0.18  | 0.04 | 4.33  | 1.48e-05  | 0.016  |
|         |        | Joint     | 0.61  | 0.04 | 16.92 | 3.22e-64  | <0.001 |
| SP1     | PAR-dr | Discovery | -0.13 | 0.35 | -0.38 | 0.705     | 1      |
|         |        | Joint     | 0.11  | 0.31 | 0.34  | 0.738     | 1      |
|         |        | Discovery | -0.32 | 0.38 | -0.86 | 0.389     | 1      |

|               |        |           |       |      |       |           |        |
|---------------|--------|-----------|-------|------|-------|-----------|--------|
|               | WL-dr  | Joint     | 0.24  | 0.3  | 0.83  | 0.408     | 1      |
| SPI1          | PAR-dr | Discovery | 0.23  | 0.04 | 5.46  | 4.89e-08  | <0.001 |
|               |        | Joint     | 0.53  | 0.04 | 13.91 | 5.24e-44  | <0.001 |
|               | WL-dr  | Discovery | 0.15  | 0.04 | 3.45  | 0.000558  | 0.114  |
|               |        | Joint     | 0.58  | 0.04 | 15.23 | 2.14e-52  | <0.001 |
| STAT1         | PAR-dr | Discovery | 0.22  | 0.03 | 8.14  | 3.84e-16  | <0.001 |
|               |        | Joint     | 0.53  | 0.03 | 20.4  | 1.7e-92   | <0.001 |
|               | WL-dr  | Discovery | 0.14  | 0.03 | 5.21  | 1.91e-07  | 0.002  |
|               |        | Joint     | 0.61  | 0.03 | 23.15 | 1.31e-118 | <0.001 |
| TAL1          | PAR-dr | Discovery | 0.3   | 0.04 | 7.61  | 2.77e-14  | <0.001 |
|               |        | Joint     | 0.58  | 0.04 | 15.66 | 2.63e-55  | <0.001 |
|               | WL-dr  | Discovery | 0.21  | 0.04 | 5.2   | 2.02e-07  | 0.002  |
|               |        | Joint     | 0.61  | 0.04 | 16.46 | 6.67e-61  | <0.001 |
| TBP           | PAR-dr | Discovery | -0.61 | 0.46 | -1.34 | 0.18      | 1      |
|               |        | Joint     | 0.15  | 0.34 | 0.43  | 0.666     | 1      |
|               | WL-dr  | Discovery | -0.01 | 0.36 | -0.01 | 0.989     | 1      |
|               |        | Joint     | 0.24  | 0.32 | 0.74  | 0.457     | 1      |
| TFAP2C        | PAR-dr | Discovery | 0.2   | 0.03 | 7.83  | 4.83e-15  | <0.001 |
|               |        | Joint     | 0.51  | 0.03 | 19.59 | 1.95e-85  | <0.001 |
|               | WL-dr  | Discovery | 0.16  | 0.03 | 6.26  | 3.81e-10  | <0.001 |
|               |        | Joint     | 0.58  | 0.03 | 22.32 | 2.53e-110 | <0.001 |
| TP53          | PAR-dr | Discovery | 0.27  | 0.04 | 6.11  | 1e-09     | <0.001 |
|               |        | Joint     | 0.49  | 0.04 | 11.93 | 8.09e-33  | <0.001 |
|               | WL-dr  | Discovery | 0.19  | 0.05 | 4.08  | 4.43e-05  | 0.031  |
|               |        | Joint     | 0.55  | 0.04 | 13.51 | 1.44e-41  | <0.001 |
| TRIM28        | PAR-dr | Discovery | 0.2   | 0.04 | 4.84  | 1.3e-06   | <0.001 |
|               |        | Joint     | 0.49  | 0.04 | 13.04 | 7.31e-39  | <0.001 |
|               | WL-dr  | Discovery | 0.19  | 0.04 | 4.59  | 4.37e-06  | 0.01   |
|               |        | Joint     | 0.53  | 0.04 | 14.15 | 1.87e-45  | <0.001 |
| VDR           | PAR-dr | Discovery | 0.18  | 0.07 | 2.75  | 0.00597   | 0.448  |
|               |        | Joint     | 0.37  | 0.06 | 6.08  | 1.22e-09  | <0.001 |
|               | WL-dr  | Discovery | 0.08  | 0.07 | 1.2   | 0.231     | 1      |
|               |        | Joint     | 0.35  | 0.06 | 5.71  | 1.11e-08  | 0.001  |
| YY1           | PAR-dr | Discovery | -0.23 | 0.3  | -0.78 | 0.432     | 1      |
|               |        | Joint     | 0.07  | 0.26 | 0.28  | 0.778     | 1      |
|               | WL-dr  | Discovery | 0.27  | 0.24 | 1.15  | 0.25      | 1      |
|               |        | Joint     | 0.54  | 0.21 | 2.57  | 0.0101    | 0.577  |
| ZNF263        | PAR-dr | Discovery | 0.05  | 0.04 | 1.22  | 0.222     | 1      |
|               |        | Joint     | 0.24  | 0.04 | 5.71  | 1.15e-08  | <0.001 |
|               | WL-dr  | Discovery | 0.14  | 0.04 | 3.28  | 0.00105   | 0.155  |
|               |        | Joint D   | 0.4   | 0.04 | 10.16 | 2.9e-24   | <0.001 |
| hsa-let-7a-5p |        | Discovery | -0.39 | 0.75 | -0.52 | 0.603     | 1      |



|                 |        |           |       |      |       |        |       |
|-----------------|--------|-----------|-------|------|-------|--------|-------|
|                 | PAR-dr | Joint     | 0.49  | 0.51 | 0.96  | 0.338  | 1     |
|                 | WL-dr  | Discovery | -1.24 | 0.98 | -1.26 | 0.208  | 1     |
|                 |        | Joint     | 0.26  | 0.57 | 0.46  | 0.642  | 1     |
| hsa-miR-1       | PAR-dr | Discovery | -0.09 | 0.45 | -0.2  | 0.839  | 1     |
|                 |        | Joint     | -0.13 | 0.46 | -0.27 | 0.784  | 1     |
|                 | WL-dr  | Discovery | 0.28  | 0.38 | 0.74  | 0.46   | 1     |
|                 |        | Joint     | 0.64  | 0.32 | 2     | 0.046  | 0.97  |
| hsa-miR-101-3p  | PAR-dr | Discovery | -0.14 | 0.61 | -0.23 | 0.822  | 1     |
|                 |        | Joint     | 0.45  | 0.47 | 0.96  | 0.336  | 1     |
|                 | WL-dr  | Discovery | 0.46  | 0.46 | 1     | 0.319  | 1     |
|                 |        | Joint     | 0.43  | 0.47 | 0.91  | 0.363  | 1     |
| hsa-miR-106a-5p | PAR-dr | Discovery | -0.45 | 0.83 | -0.55 | 0.586  | 1     |
|                 |        | Joint     | 0.15  | 0.65 | 0.22  | 0.823  | 1     |
|                 | WL-dr  | Discovery | -1.45 | 1.13 | -1.28 | 0.201  | 1     |
|                 |        | Joint     | -0.64 | 0.89 | -0.72 | 0.472  | 1     |
| hsa-miR-106b-5p | PAR-dr | Discovery | -0.79 | 0.73 | -1.08 | 0.279  | 1     |
|                 |        | Joint     | -0.24 | 0.6  | -0.4  | 0.692  | 1     |
|                 | WL-dr  | Discovery | -0.27 | 0.61 | -0.44 | 0.657  | 1     |
|                 |        | Joint     | -0.22 | 0.59 | -0.37 | 0.713  | 1     |
| hsa-miR-107     | PAR-dr | Discovery | 0.58  | 0.5  | 1.15  | 0.251  | 1     |
|                 |        | Joint     | 0.72  | 0.47 | 1.54  | 0.124  | 1     |
|                 | WL-dr  | Discovery | 0.76  | 0.45 | 1.68  | 0.0928 | 1     |
|                 |        | Joint     | 0.69  | 0.47 | 1.46  | 0.144  | 1     |
| hsa-miR-122-5p  | PAR-dr | Discovery | -0.02 | 0.5  | -0.04 | 0.965  | 1     |
|                 |        | Joint     | 0     | 0.49 | 0     | 0.998  | 1     |
|                 | WL-dr  | Discovery | -0.04 | 0.5  | -0.07 | 0.94   | 1     |
|                 |        | Joint     | 0.24  | 0.44 | 0.56  | 0.579  | 1     |
| hsa-miR-124-3p  | PAR-dr | Discovery | -0.2  | 0.53 | -0.37 | 0.713  | 1     |
|                 |        | Joint     | 0.01  | 0.49 | 0.03  | 0.977  | 1     |
|                 | WL-dr  | Discovery | -0.59 | 0.62 | -0.96 | 0.336  | 1     |
|                 |        | Joint     | 0.26  | 0.44 | 0.6   | 0.548  | 1     |
| hsa-miR-125b-5p | PAR-dr | Discovery | 0.08  | 0.44 | 0.19  | 0.853  | 1     |
|                 |        | Joint     | 0.09  | 0.44 | 0.19  | 0.846  | 1     |
|                 | WL-dr  | Discovery | 0.54  | 0.36 | 1.52  | 0.13   | 1     |
|                 |        | Joint     | 0.66  | 0.33 | 1.97  | 0.0485 | 0.976 |
| hsa-miR-130a-3p | PAR-dr | Discovery | 0.83  | 0.44 | 1.89  | 0.0584 | 0.99  |
|                 |        | Joint     | 0.89  | 0.42 | 2.12  | 0.034  | 0.922 |
|                 | WL-dr  | Discovery | -0.6  | 0.84 | -0.72 | 0.471  | 1     |
|                 |        | Joint     | 0.22  | 0.6  | 0.36  | 0.718  | 1     |
| hsa-miR-133b    | PAR-dr | Discovery | 0.87  | 0.43 | 2.04  | 0.0414 | 0.959 |
|                 |        | Joint     | 0.77  | 0.45 | 1.7   | 0.0887 | 1     |
|                 |        | Discovery | -0.11 | 0.7  | -0.16 | 0.875  | 1     |

|                 |        |           |       |      |       |          |       |
|-----------------|--------|-----------|-------|------|-------|----------|-------|
|                 | WL-dr  | Joint     | 0.57  | 0.5  | 1.13  | 0.257    | 1     |
| hsa-miR-137     | PAR-dr | Discovery | -0.34 | 0.76 | -0.45 | 0.653    | 1     |
|                 |        | Joint     | -0.29 | 0.75 | -0.39 | 0.7      | 1     |
|                 | WL-dr  | Discovery | -0.44 | 0.79 | -0.56 | 0.576    | 1     |
|                 |        | Joint     | -0.19 | 0.72 | -0.27 | 0.787    | 1     |
| hsa-miR-138-5p  | PAR-dr | Discovery | 0.45  | 0.45 | 0.98  | 0.326    | 1     |
|                 |        | Joint     | 0.73  | 0.39 | 1.86  | 0.0623   | 0.99  |
|                 | WL-dr  | Discovery | -0.44 | 0.67 | -0.67 | 0.505    | 1     |
|                 |        | Joint     | 0.06  | 0.55 | 0.11  | 0.915    | 1     |
| hsa-miR-141-3p  | PAR-dr | Discovery | 0.07  | 0.47 | 0.15  | 0.884    | 1     |
|                 |        | Joint     | 0.6   | 0.36 | 1.68  | 0.0923   | 1     |
|                 | WL-dr  | Discovery | -0.6  | 0.6  | -0.99 | 0.323    | 1     |
|                 |        | Joint     | 0.02  | 0.48 | 0.04  | 0.967    | 1     |
| hsa-miR-145-5p  | PAR-dr | Discovery | -0.15 | 0.34 | -0.43 | 0.668    | 1     |
|                 |        | Joint     | 0.42  | 0.26 | 1.6   | 0.11     | 1     |
|                 | WL-dr  | Discovery | 0.16  | 0.3  | 0.54  | 0.588    | 1     |
|                 |        | Joint     | 0.42  | 0.27 | 1.59  | 0.113    | 1     |
| hsa-miR-155-5p  | PAR-dr | Discovery | 0.11  | 0.19 | 0.61  | 0.543    | 1     |
|                 |        | Joint     | 0.66  | 0.14 | 4.66  | 3.22e-06 | 0.004 |
|                 | WL-dr  | Discovery | 0.16  | 0.18 | 0.87  | 0.386    | 1     |
|                 |        | Joint     | 0.49  | 0.16 | 3.17  | 0.00155  | 0.185 |
| hsa-miR-15a-5p  | PAR-dr | Discovery | -0.54 | 0.69 | -0.78 | 0.437    | 1     |
|                 |        | Joint     | 0.47  | 0.45 | 1.06  | 0.288    | 1     |
|                 | WL-dr  | Discovery | -0.49 | 0.68 | -0.73 | 0.467    | 1     |
|                 |        | Joint     | -0.22 | 0.61 | -0.36 | 0.719    | 1     |
| hsa-miR-16-5p   | PAR-dr | Discovery | -1.29 | 0.77 | -1.69 | 0.0914   | 1     |
|                 |        | Joint     | 0.14  | 0.46 | 0.31  | 0.757    | 1     |
|                 | WL-dr  | Discovery | 0.16  | 0.47 | 0.34  | 0.736    | 1     |
|                 |        | Joint     | -0.45 | 0.6  | -0.75 | 0.451    | 1     |
| hsa-miR-17-5p   | PAR-dr | Discovery | -0.36 | 0.44 | -0.8  | 0.421    | 1     |
|                 |        | Joint     | -0.02 | 0.39 | -0.04 | 0.967    | 1     |
|                 | WL-dr  | Discovery | -0.36 | 0.45 | -0.8  | 0.422    | 1     |
|                 |        | Joint     | 0.12  | 0.37 | 0.33  | 0.739    | 1     |
| hsa-miR-181a-5p | PAR-dr | Discovery | -0.04 | 0.55 | -0.07 | 0.944    | 1     |
|                 |        | Joint     | 0.47  | 0.43 | 1.08  | 0.28     | 1     |
|                 | WL-dr  | Discovery | 0.09  | 0.52 | 0.17  | 0.867    | 1     |
|                 |        | Joint     | 0.13  | 0.51 | 0.25  | 0.799    | 1     |
| hsa-miR-181b-5p | PAR-dr | Discovery | -1.32 | 1.01 | -1.32 | 0.188    | 1     |
|                 |        | Joint     | -0.7  | 0.83 | -0.84 | 0.399    | 1     |
|                 | WL-dr  | Discovery | -0.64 | 0.82 | -0.78 | 0.433    | 1     |
|                 |        | Joint     | 0.36  | 0.54 | 0.66  | 0.507    | 1     |

|                 |        |           |       |      |       |        |       |
|-----------------|--------|-----------|-------|------|-------|--------|-------|
| hsa-miR-182-5p  | PAR-dr | Discovery | -0.3  | 0.78 | -0.38 | 0.704  | 1     |
|                 |        | Joint     | 0.32  | 0.6  | 0.53  | 0.594  | 1     |
|                 | WL-dr  | Discovery | -0.79 | 0.93 | -0.85 | 0.397  | 1     |
|                 |        | Joint     | -0.64 | 0.89 | -0.72 | 0.469  | 1     |
| hsa-miR-192-5p  | PAR-dr | Discovery | -0.48 | 0.8  | -0.59 | 0.553  | 1     |
|                 |        | Joint     | -0.25 | 0.74 | -0.34 | 0.734  | 1     |
|                 | WL-dr  | Discovery | -0.46 | 0.8  | -0.58 | 0.563  | 1     |
|                 |        | Joint     | -0.41 | 0.78 | -0.52 | 0.6    | 1     |
| hsa-miR-195-5p  | PAR-dr | Discovery | -3.29 | 1.55 | -2.12 | 0.0339 | 0.932 |
|                 |        | Joint     | -1.56 | 1.07 | -1.46 | 0.145  | 1     |
|                 | WL-dr  | Discovery | -0.25 | 0.71 | -0.36 | 0.719  | 1     |
|                 |        | Joint     | -0.21 | 0.7  | -0.3  | 0.765  | 1     |
| hsa-miR-19a-3p  | PAR-dr | Discovery | -0.12 | 0.56 | -0.21 | 0.836  | 1     |
|                 |        | Joint     | 0     | 0.53 | -0.01 | 0.994  | 1     |
|                 | WL-dr  | Discovery | 0.17  | 0.49 | 0.36  | 0.722  | 1     |
|                 |        | Joint     | 0.5   | 0.42 | 1.2   | 0.23   | 1     |
| hsa-miR-19b-3p  | PAR-dr | Discovery | -0.06 | 0.71 | -0.08 | 0.935  | 1     |
|                 |        | Joint     | 0.23  | 0.63 | 0.37  | 0.713  | 1     |
|                 | WL-dr  | Discovery | 0.22  | 0.63 | 0.35  | 0.723  | 1     |
|                 |        | Joint     | 0.84  | 0.45 | 1.86  | 0.0632 | 0.997 |
| hsa-miR-200a-3p | PAR-dr | Discovery | 0.34  | 0.48 | 0.72  | 0.472  | 1     |
|                 |        | Joint     | 0.28  | 0.49 | 0.58  | 0.563  | 1     |
|                 | WL-dr  | Discovery | 0.1   | 0.54 | 0.18  | 0.857  | 1     |
|                 |        | Joint     | 0.35  | 0.48 | 0.73  | 0.466  | 1     |
| hsa-miR-200b-3p | PAR-dr | Discovery | 0.59  | 0.41 | 1.45  | 0.147  | 1     |
|                 |        | Joint     | 0.51  | 0.43 | 1.2   | 0.231  | 1     |
|                 | WL-dr  | Discovery | 0.25  | 0.48 | 0.52  | 0.601  | 1     |
|                 |        | Joint     | 0.35  | 0.46 | 0.75  | 0.453  | 1     |
| hsa-miR-200c-3p | PAR-dr | Discovery | 0.49  | 0.36 | 1.36  | 0.174  | 1     |
|                 |        | Joint     | 0.59  | 0.35 | 1.71  | 0.0874 | 1     |
|                 | WL-dr  | Discovery | 0.08  | 0.45 | 0.18  | 0.859  | 1     |
|                 |        | Joint     | 0.32  | 0.4  | 0.8   | 0.425  | 1     |
| hsa-miR-203a    | PAR-dr | Discovery | -0.6  | 0.7  | -0.85 | 0.396  | 1     |
|                 |        | Joint     | -1.42 | 0.9  | -1.57 | 0.115  | 1     |
|                 | WL-dr  | Discovery | -0.56 | 0.72 | -0.78 | 0.435  | 1     |
|                 |        | Joint     | -0.68 | 0.75 | -0.91 | 0.361  | 1     |
| hsa-miR-204-5p  | PAR-dr | Discovery | 0.08  | 0.43 | 0.18  | 0.859  | 1     |
|                 |        | Joint     | 0.47  | 0.35 | 1.34  | 0.182  | 1     |
|                 | WL-dr  | Discovery | -0.07 | 0.46 | -0.14 | 0.886  | 1     |
|                 |        | Joint     | 0.42  | 0.36 | 1.16  | 0.247  | 1     |
| hsa-miR-205-5p  | PAR-dr | Discovery | -2.14 | 1.19 | -1.8  | 0.0716 | 0.995 |
|                 |        | Joint     | -0.7  | 0.8  | -0.87 | 0.382  | 1     |
|                 |        | Discovery | 0.45  | 0.5  | 0.9   | 0.37   | 1     |

|                |        |           |       |      |       |          |       |
|----------------|--------|-----------|-------|------|-------|----------|-------|
|                | WL-dr  | Joint     | 0.85  | 0.4  | 2.15  | 0.0319   | 0.91  |
| hsa-miR-20a-5p | PAR-dr | Discovery | -0.38 | 0.55 | -0.7  | 0.484    | 1     |
|                |        | Joint     | 0.14  | 0.44 | 0.31  | 0.754    | 1     |
|                | WL-dr  | Discovery | -0.24 | 0.52 | -0.46 | 0.646    | 1     |
|                |        | Joint     | -0.07 | 0.49 | -0.15 | 0.88     | 1     |
| hsa-miR-20b-5p | PAR-dr | Discovery | 0.13  | 0.66 | 0.2   | 0.845    | 1     |
|                |        | Joint     | 0.72  | 0.49 | 1.48  | 0.14     | 1     |
|                | WL-dr  | Discovery | -2.09 | 1.33 | -1.58 | 0.114    | 1     |
|                |        | Joint     | 0.2   | 0.64 | 0.31  | 0.759    | 1     |
| hsa-miR-21-5p  | PAR-dr | Discovery | -0.51 | 0.45 | -1.13 | 0.26     | 1     |
|                |        | Joint     | 0.23  | 0.33 | 0.69  | 0.491    | 1     |
|                | WL-dr  | Discovery | -0.22 | 0.4  | -0.55 | 0.583    | 1     |
|                |        | Joint     | -0.12 | 0.39 | -0.3  | 0.761    | 1     |
| hsa-miR-218-5p | PAR-dr | Discovery | 0.27  | 0.55 | 0.49  | 0.624    | 1     |
|                |        | Joint     | 0.62  | 0.45 | 1.36  | 0.173    | 1     |
|                | WL-dr  | Discovery | 1.33  | 0.3  | 4.48  | 7.63e-06 | 0.011 |
|                |        | Joint     | 0.73  | 0.43 | 1.69  | 0.0902   | 1     |
| hsa-miR-221-3p | PAR-dr | Discovery | 0.79  | 0.38 | 2.09  | 0.0362   | 0.942 |
|                |        | Joint     | 0.86  | 0.36 | 2.39  | 0.0167   | 0.738 |
|                | WL-dr  | Discovery | -0.36 | 0.64 | -0.55 | 0.581    | 1     |
|                |        | Joint     | -0.13 | 0.59 | -0.22 | 0.827    | 1     |
| hsa-miR-222-3p | PAR-dr | Discovery | -0.03 | 0.62 | -0.04 | 0.965    | 1     |
|                |        | Joint     | 0.1   | 0.59 | 0.18  | 0.86     | 1     |
|                | WL-dr  | Discovery | -0.44 | 0.73 | -0.6  | 0.552    | 1     |
|                |        | Joint     | -0.26 | 0.68 | -0.37 | 0.708    | 1     |
| hsa-miR-223-3p | PAR-dr | Discovery | 0.18  | 0.53 | 0.33  | 0.742    | 1     |
|                |        | Joint     | 0.7   | 0.41 | 1.72  | 0.0849   | 1     |
|                | WL-dr  | Discovery | -0.01 | 0.58 | -0.02 | 0.986    | 1     |
|                |        | Joint     | -0.57 | 0.72 | -0.79 | 0.43     | 1     |
| hsa-miR-23a-3p | PAR-dr | Discovery | 0.3   | 0.54 | 0.56  | 0.578    | 1     |
|                |        | Joint     | 0.4   | 0.51 | 0.78  | 0.434    | 1     |
|                | WL-dr  | Discovery | -0.29 | 0.69 | -0.42 | 0.674    | 1     |
|                |        | Joint     | 0.62  | 0.45 | 1.36  | 0.174    | 1     |
| hsa-miR-24-3p  | PAR-dr | Discovery | -0.06 | 0.57 | -0.1  | 0.92     | 1     |
|                |        | Joint     | 0.31  | 0.48 | 0.65  | 0.518    | 1     |
|                | WL-dr  | Discovery | 0.5   | 0.44 | 1.14  | 0.253    | 1     |
|                |        | Joint     | 0.48  | 0.45 | 1.07  | 0.284    | 1     |
| hsa-miR-26a-5p | PAR-dr | Discovery | -0.18 | 0.5  | -0.36 | 0.716    | 1     |
|                |        | Joint     | -0.27 | 0.51 | -0.52 | 0.604    | 1     |
|                | WL-dr  | Discovery | -1.72 | 0.8  | -2.14 | 0.0328   | 0.925 |
|                |        | Joint     | -0.38 | 0.54 | -0.71 | 0.477    | 1     |
| hsa-miR-27a-3p |        | Discovery | 0.01  | 0.64 | 0.01  | 0.988    | 1     |

|                |        |           |       |       |       |         |       |
|----------------|--------|-----------|-------|-------|-------|---------|-------|
|                | PAR-dr | Joint     | -0.03 | 0.65  | -0.05 | 0.964   | 1     |
|                | WL-dr  | Discovery | -0.43 | 0.76  | -0.57 | 0.57    | 1     |
| Joint          |        | -0.18     | 0.69  | -0.27 | 0.79  | 1       |       |
| hsa-miR-29a-3p | PAR-dr | Discovery | -0.46 | 0.55  | -0.84 | 0.403   | 1     |
|                |        | Joint     | 0.28  | 0.41  | 0.7   | 0.483   | 1     |
|                | WL-dr  | Discovery | 0.37  | 0.4   | 0.95  | 0.344   | 1     |
|                |        | Joint     | 0.92  | 0.29  | 3.14  | 0.0017  | 0.193 |
| hsa-miR-29b-3p | PAR-dr | Discovery | -0.11 | 0.43  | -0.24 | 0.808   | 1     |
|                |        | Joint     | 0.13  | 0.39  | 0.34  | 0.736   | 1     |
|                | WL-dr  | Discovery | 0.15  | 0.39  | 0.38  | 0.702   | 1     |
|                |        | Joint     | 0.75  | 0.28  | 2.63  | 0.00866 | 0.528 |
| hsa-miR-29c-3p | PAR-dr | Discovery | -0.31 | 0.56  | -0.56 | 0.577   | 1     |
|                |        | Joint     | 0.28  | 0.43  | 0.63  | 0.526   | 1     |
|                | WL-dr  | Discovery | 0.19  | 0.45  | 0.43  | 0.67    | 1     |
|                |        | Joint     | 0.94  | 0.3   | 3.13  | 0.00172 | 0.194 |
| hsa-miR-30a-5p | PAR-dr | Discovery | -1.82 | 1.24  | -1.46 | 0.143   | 1     |
|                |        | Joint     | -1.16 | 1.04  | -1.11 | 0.266   | 1     |
|                | WL-dr  | Discovery | 0.34  | 0.59  | 0.57  | 0.569   | 1     |
|                |        | Joint     | 0.41  | 0.57  | 0.71  | 0.48    | 1     |
| hsa-miR-31-5p  | PAR-dr | Discovery | 0.73  | 0.33  | 2.25  | 0.0246  | 0.861 |
|                |        | Joint     | 0.58  | 0.36  | 1.63  | 0.103   | 1     |
|                | WL-dr  | Discovery | 0.37  | 0.4   | 0.95  | 0.344   | 1     |
|                |        | Joint     | 0.53  | 0.37  | 1.44  | 0.149   | 1     |
| hsa-miR-34a-5p | PAR-dr | Discovery | -0.62 | 0.51  | -1.21 | 0.225   | 1     |
|                |        | Joint     | -0.34 | 0.46  | -0.73 | 0.465   | 1     |
|                | WL-dr  | Discovery | -0.11 | 0.42  | -0.27 | 0.789   | 1     |
|                |        | Joint     | -0.39 | 0.47  | -0.84 | 0.401   | 1     |
| hsa-miR-424-5p | PAR-dr | Discovery | -0.32 | 0.62  | -0.52 | 0.603   | 1     |
|                |        | Joint     | -0.24 | 0.6   | -0.4  | 0.691   | 1     |
|                | WL-dr  | Discovery | -1.16 | 0.82  | -1.42 | 0.155   | 1     |
|                |        | Joint     | -0.28 | 0.61  | -0.45 | 0.649   | 1     |
| hsa-miR-7-5p   | PAR-dr | Discovery | 0.53  | 0.54  | 0.98  | 0.327   | 1     |
|                |        | Joint     | 0.99  | 0.41  | 2.41  | 0.016   | 0.723 |
|                | WL-dr  | Discovery | 0.92  | 0.43  | 2.15  | 0.0316  | 0.921 |
|                |        | Joint     | 0.99  | 0.41  | 2.4   | 0.0166  | 0.741 |
| hsa-miR-9-5p   | PAR-dr | Discovery | 0.01  | 0.59  | 0.01  | 0.988   | 1     |
|                |        | Joint     | 0.36  | 0.5   | 0.71  | 0.48    | 1     |
|                | WL-dr  | Discovery | 0.49  | 0.47  | 1.05  | 0.296   | 1     |
|                |        | Joint     | 0.16  | 0.55  | 0.29  | 0.774   | 1     |

**NOTE: Joint equals the summary results from meta-analysis of discovery and replication cohorts**

**Table S5: Significant Genes Associated with Paragraph Delayed Recall (PAR-dr) and Word List Delayed Recall (WL-dr)**

| Gene Id <sup>1</sup> | Gene Name        | chr | start (bp) | end (bp) | strand | Gene_p (PAR-dr) <sup>2</sup> | Gene_p (WL-dr) <sup>3</sup> | Significant <sup>4</sup> |
|----------------------|------------------|-----|------------|----------|--------|------------------------------|-----------------------------|--------------------------|
| 3107                 | <i>HLA-C</i>     | 6   | 31236526   | 31239913 | -      | 3.91E-11                     | 8.73E-18                    | BOTH                     |
| 116935               | <i>RPL3P2</i>    | 6   | 31248068   | 31249348 | +      | 3.91E-11                     | 8.73E-18                    | BOTH                     |
| 100287272            | <i>USP8P1</i>    | 6   | 31243351   | 31246528 | +      | 3.91E-11                     | 8.73E-18                    | BOTH                     |
| 352961               | <i>HCG26</i>     | 6   | 31439006   | 31440185 | +      | 3.91E-11                     | 1.17E-15                    | BOTH                     |
| 404026               | <i>MTCO3P1</i>   | 6   | 32673921   | 32674580 | -      | 3.91E-11                     | 9.64E-14                    | BOTH                     |
| 6992                 | <i>PPP1R11</i>   | 6   | 30034932   | 30038110 | +      | 3.91E-11                     | 2.32E-10                    | BOTH                     |
| 7726                 | <i>TRIM26</i>    | 6   | 30152232   | 30181271 | -      | 3.91E-11                     | 2.32E-10                    | BOTH                     |
| 100421582            | <i>PAIP1P1</i>   | 6   | 30154575   | 30156383 | -      | 3.91E-11                     | 2.32E-10                    | BOTH                     |
| 80352                | <i>RNF39</i>     | 6   | 30038043   | 30043628 | -      | 3.91E-11                     | 7.42E-09                    | BOTH                     |
| 100507679            | <i>MUC22</i>     | 6   | 30973729   | 31003179 | +      | 5.98E-09                     | 3.05E-20                    | BOTH                     |
| 352963               | <i>HLA-P</i>     | 6   | 29767821   | 29770856 | +      | 5.98E-09                     | 8.73E-18                    | BOTH                     |
| 353013               | <i>RPL7AP7</i>   | 6   | 29770910   | 29771797 | -      | 5.98E-09                     | 8.73E-18                    | BOTH                     |
| 353014               | <i>HCG4P9</i>    | 6   | 29766201   | 29767903 | -      | 5.98E-09                     | 8.73E-18                    | BOTH                     |
| 554223               | <i>LOC554223</i> | 6   | 29759683   | 29765584 | +      | 5.98E-09                     | 8.73E-18                    | BOTH                     |
| 10866                | <i>HCP5</i>      | 6   | 31430957   | 31433586 | +      | 5.98E-09                     | 1.17E-15                    | BOTH                     |
| 11074                | <i>TRIM31</i>    | 6   | 30070674   | 30080867 | -      | 5.98E-09                     | 1.17E-15                    | BOTH                     |
| 267016               | <i>HLA-X</i>     | 6   | 31429623   | 31430267 | -      | 5.98E-09                     | 1.17E-15                    | BOTH                     |
| 352967               | <i>MICG</i>      | 6   | 29780167   | 29780469 | -      | 5.98E-09                     | 1.17E-15                    | BOTH                     |
| 353010               | <i>3.8-1.5</i>   | 6   | 29732893   | 29734073 | -      | 5.98E-09                     | 1.17E-15                    | BOTH                     |
| 3109                 | <i>HLA-DMB</i>   | 6   | 32902406   | 32908847 | -      | 5.98E-09                     | 9.64E-14                    | BOTH                     |
| 3116                 | <i>HLA-DPB2</i>  | 6   | 33080293   | 33096890 | +      | 5.98E-09                     | 5.53E-12                    | BOTH                     |
| 3120                 | <i>HLA-DQB2</i>  | 6   | 32723837   | 32731330 | -      | 5.98E-09                     | 5.53E-12                    | BOTH                     |
| 56244                | <i>BTNL2</i>     | 6   | 32362513   | 32374900 | -      | 5.98E-09                     | 5.53E-12                    | BOTH                     |
| 267013               | <i>HLA-DPA3</i>  | 6   | 33098974   | 33099120 | -      | 5.98E-09                     | 5.53E-12                    | BOTH                     |
| 3118                 | <i>HLA-DQA2</i>  | 6   | 32709156   | 32714664 | +      | 5.98E-09                     | 2.32E-10                    | BOTH                     |
| 10107                | <i>TRIM10</i>    | 6   | 30119722   | 30128711 | -      | 5.98E-09                     | 2.32E-10                    | BOTH                     |
| 10255                | <i>HCG9</i>      | 6   | 29942892   | 29946180 | +      | 5.98E-09                     | 2.32E-10                    | BOTH                     |
| 79897                | <i>RPP21</i>     | 6   | 30312897   | 30314635 | +      | 5.98E-09                     | 2.32E-10                    | BOTH                     |
| 89870                | <i>TRIM15</i>    | 6   | 30130968   | 30140473 | +      | 5.98E-09                     | 2.32E-10                    | BOTH                     |
| 135644               | <i>TRIM40</i>    | 6   | 30103885   | 30116512 | +      | 5.98E-09                     | 2.32E-10                    | BOTH                     |
| 285829               | <i>SUMO2P1</i>   | 6   | 29603231   | 29604281 | -      | 5.98E-09                     | 2.32E-10                    | BOTH                     |
| 414778               | <i>HCG17</i>     | 6   | 30201816   | 30293911 | -      | 5.98E-09                     | 2.32E-10                    | BOTH                     |
| 30834                | <i>ZNRD1</i>     | 6   | 30029017   | 30032686 | +      | 5.98E-09                     | 7.42E-09                    | BOTH                     |
| 56658                | <i>TRIM39</i>    | 6   | 30294227   | 30311506 | +      | 5.98E-09                     | 7.42E-09                    | BOTH                     |
| 414777               | <i>HCG18</i>     | 6   | 30255174   | 30294933 | -      | 5.98E-09                     | 7.42E-09                    | BOTH                     |
| 4855                 | <i>NOTCH4</i>    | 6   | 32162620   | 32191844 | -      | 4.01E-07                     | 3.05E-20                    | BOTH                     |
| 100507436            | <i>MICA</i>      | 6   | 31367561   | 31383090 | +      | 4.01E-07                     | 3.05E-20                    | BOTH                     |

|           |                     |   |               |           |   |          |          |      |
|-----------|---------------------|---|---------------|-----------|---|----------|----------|------|
| 54435     | <i>HCG4</i>         | 6 | 29758808      | 29760850  | - | 4.01E-07 | 8.73E-18 | BOTH |
| 352962    | <i>HLA-V</i>        | 6 | 29759530      | 29760527  | + | 4.01E-07 | 8.73E-18 | BOTH |
| 3106      | <i>HLA-B</i>        | 6 | 31321649      | 31324989  | - | 4.01E-07 | 1.17E-15 | BOTH |
| 3135      | <i>HLA-G</i>        | 6 | 29794756      | 29798899  | + | 4.01E-07 | 1.17E-15 | BOTH |
| 9659      | <i>PDE4DIP</i>      | 1 | 14485142<br>4 | 145076186 | - | 4.01E-07 | 1.17E-15 | BOTH |
| 267017    | <i>HLA-Z</i>        | 6 | 32864179      | 32864266  | + | 4.01E-07 | 1.17E-15 | BOTH |
| 340198    | <i>IFITM4P</i>      | 6 | 29718584      | 29718925  | - | 4.01E-07 | 1.17E-15 | BOTH |
| 353000    | <i>HCGVIII-2</i>    | 6 | 29801426      | 29802705  | - | 4.01E-07 | 1.17E-15 | BOTH |
| 353005    | <i>HCG4P8</i>       | 6 | 29793906      | 29794891  | - | 4.01E-07 | 1.17E-15 | BOTH |
| 729816    | <i>DHFRP2</i>       | 6 | 31331244      | 31334742  | - | 4.01E-07 | 1.17E-15 | BOTH |
| 100129192 | <i>MICC</i>         | 6 | 30382490      | 30387543  | + | 4.01E-07 | 1.17E-15 | BOTH |
| 100294145 | <i>LOC100294145</i> | 6 | 32861953      | 32871535  | + | 4.01E-07 | 1.17E-15 | BOTH |
| 353002    | <i>HCG4P4</i>       | 6 | 29922982      | 29923410  | - | 4.01E-07 | 9.64E-14 | BOTH |
| 394214    | <i>COL11A2P1</i>    | 6 | 33071470      | 33074921  | - | 4.01E-07 | 9.64E-14 | BOTH |
| 414764    | <i>HCG23</i>        | 6 | 32358287      | 32361468  | + | 4.01E-07 | 9.64E-14 | BOTH |
| 3108      | <i>HLA-DMA</i>      | 6 | 32916391      | 32920900  | - | 4.01E-07 | 5.53E-12 | BOTH |
| 3139      | <i>HLA-L</i>        | 6 | 30227339      | 30234728  | + | 4.01E-07 | 5.53E-12 | BOTH |
| 4279      | <i>MICD</i>         | 6 | 29938149      | 29943522  | - | 4.01E-07 | 5.53E-12 | BOTH |
| 387117    | <i>UBQLN1P1</i>     | 6 | 30326371      | 30331888  | - | 4.01E-07 | 5.53E-12 | BOTH |
| 404024    | <i>TRIM26BP</i>     | 6 | 30206078      | 30210056  | + | 4.01E-07 | 5.53E-12 | BOTH |
| 3137      | <i>HLA-J</i>        | 6 | 29973748      | 29977733  | + | 4.01E-07 | 2.32E-10 | BOTH |
| 6824      | <i>ETF1P1</i>       | 6 | 29999490      | 30001654  | + | 4.01E-07 | 2.32E-10 | BOTH |
| 267014    | <i>HLA-N</i>        | 6 | 30318851      | 30319815  | + | 4.01E-07 | 2.32E-10 | BOTH |
| 353001    | <i>HCG4P3</i>       | 6 | 29972622      | 29973605  | - | 4.01E-07 | 2.32E-10 | BOTH |
| 100507399 | <i>HCG8</i>         | 6 | 29979878      | 29981699  | - | 4.01E-07 | 2.32E-10 | BOTH |
| 135656    | <i>DPCR1</i>        | 6 | 30908777      | 30921998  | + | 4.01E-07 | 7.42E-09 | BOTH |
| 80862     | <i>ZNRD1-AS1</i>    | 6 | 29968788      | 30028961  | - | 4.01E-07 | 1.83E-07 | BOTH |
| 442184    | <i>OR2B3</i>        | 6 | 29053985      | 29055090  | - | 4.01E-07 | 1.83E-07 | BOTH |
| 442185    | <i>OR2J1</i>        | 6 | 29068720      | 29069655  | + | 4.01E-07 | 1.83E-07 | BOTH |
| 26717     | <i>OR2G1P</i>       | 6 | 29197007      | 29197997  | - | 4.01E-07 | 3.52E-06 | PAR  |
| 442189    | <i>OR2H4P</i>       | 6 | 29183013      | 29183953  | + | 4.01E-07 | 3.52E-06 | PAR  |
| 56940     | <i>DUSP22</i>       | 6 | 292101        | 351355    | + | 4.01E-07 | 5.28E-05 | PAR  |
| 285834    | <i>HCG22</i>        | 6 | 31021227      | 31027667  | + | 1.54E-05 | 8.73E-18 | WL   |
| 100131609 | <i>HNRNPA1P2</i>    | 6 | 32293175      | 32294298  | + | 1.54E-05 | 8.73E-18 | WL   |
| 3122      | <i>HLA-DRA</i>      | 6 | 32407619      | 32412823  | + | 1.54E-05 | 1.17E-15 | WL   |
| 5460      | <i>POU5F1</i>       | 6 | 31132114      | 31138451  | - | 1.54E-05 | 1.17E-15 | WL   |
| 267015    | <i>HLA-S</i>        | 6 | 31349346      | 31350264  | - | 1.54E-05 | 1.17E-15 | WL   |
| 100462812 | <i>FGFR3P1</i>      | 6 | 31345494      | 31345805  | + | 1.54E-05 | 1.17E-15 | WL   |
| 1460      | <i>CSNK2B</i>       | 6 | 31632995      | 31637844  | + | 1.54E-05 | 9.64E-14 | WL   |
| 3132      | <i>HLA-DRB9</i>     | 6 | 32427597      | 32427866  | - | 1.54E-05 | 9.64E-14 | WL   |

|           |                  |    |          |          |   |          |          |    |
|-----------|------------------|----|----------|----------|---|----------|----------|----|
| 7917      | <i>BAG6</i>      | 6  | 31606805 | 31620953 | - | 1.54E-05 | 9.64E-14 | WL |
| 7918      | <i>GPANK1</i>    | 6  | 31629006 | 31634060 | - | 1.54E-05 | 9.64E-14 | WL |
| 55937     | <i>APOM</i>      | 6  | 31620187 | 31625987 | + | 1.54E-05 | 9.64E-14 | WL |
| 57827     | <i>C6ORF47</i>   | 6  | 31626075 | 31628549 | - | 1.54E-05 | 9.64E-14 | WL |
| 79969     | <i>ATAT1</i>     | 6  | 30594613 | 30614598 | + | 1.54E-05 | 9.64E-14 | WL |
| 253018    | <i>HCG27</i>     | 6  | 31165537 | 31171745 | + | 1.54E-05 | 9.64E-14 | WL |
| 353019    | <i>HCG9P5</i>    | 6  | 29716031 | 29716425 | + | 1.54E-05 | 9.64E-14 | WL |
| 394263    | <i>MUC21</i>     | 6  | 30951485 | 30957675 | + | 1.54E-05 | 9.64E-14 | WL |
| 100130889 | <i>PSORS1C3</i>  | 6  | 31141512 | 31145676 | - | 1.54E-05 | 9.64E-14 | WL |
| 2550      | <i>GABBR1</i>    | 6  | 29570005 | 29600962 | - | 1.54E-05 | 5.53E-12 | WL |
| 3113      | <i>HLA-DPA1</i>  | 6  | 33032346 | 33048555 | - | 1.54E-05 | 5.53E-12 | WL |
| 3115      | <i>HLA-DPB1</i>  | 6  | 33043703 | 33057473 | + | 1.54E-05 | 5.53E-12 | WL |
| 6163      | <i>RPL32P1</i>   | 6  | 33047076 | 33047788 | + | 1.54E-05 | 5.53E-12 | WL |
| 7916      | <i>PRRC2A</i>    | 6  | 31588450 | 31605554 | + | 1.54E-05 | 5.53E-12 | WL |
| 7920      | <i>ABHD16A</i>   | 6  | 31654726 | 31671137 | - | 1.54E-05 | 5.53E-12 | WL |
| 10537     | <i>UBD</i>       | 6  | 29523389 | 29527702 | - | 1.54E-05 | 5.53E-12 | WL |
| 58530     | <i>LY6G6D</i>    | 6  | 31683048 | 31685698 | + | 1.54E-05 | 5.53E-12 | WL |
| 79136     | <i>LY6G6E</i>    | 6  | 31679753 | 31681842 | - | 1.54E-05 | 5.53E-12 | WL |
| 81696     | <i>OR5V1</i>     | 6  | 29323007 | 29324054 | - | 1.54E-05 | 5.53E-12 | WL |
| 259215    | <i>LY6G6F</i>    | 6  | 31674625 | 31678372 | + | 1.54E-05 | 5.53E-12 | WL |
| 352964    | <i>HLA-T</i>     | 6  | 29864220 | 29866724 | + | 1.54E-05 | 5.53E-12 | WL |
| 352965    | <i>HLA-U</i>     | 6  | 29901541 | 29902657 | + | 1.54E-05 | 5.53E-12 | WL |
| 352966    | <i>HLA-W</i>     | 6  | 29923611 | 29926835 | + | 1.54E-05 | 5.53E-12 | WL |
| 442191    | <i>OR14J1</i>    | 6  | 29274467 | 29275432 | + | 1.54E-05 | 5.53E-12 | WL |
| 442197    | <i>OR21P</i>     | 6  | 29520882 | 29521940 | + | 1.54E-05 | 5.53E-12 | WL |
| 646702    | <i>HLA-DPA2</i>  | 6  | 33059259 | 33061091 | - | 1.54E-05 | 5.53E-12 | WL |
| 3105      | <i>HLA-A</i>     | 6  | 29910247 | 29913661 | + | 1.54E-05 | 2.32E-10 | WL |
| 3138      | <i>HLA-K</i>     | 6  | 29894436 | 29897616 | + | 1.54E-05 | 2.32E-10 | WL |
| 5758      | <i>PTMAP1</i>    | 6  | 30601227 | 30603014 | + | 1.54E-05 | 2.32E-10 | WL |
| 6046      | <i>BRD2</i>      | 6  | 32936437 | 32949282 | + | 1.54E-05 | 2.32E-10 | WL |
| 26713     | <i>OR2H5P</i>    | 6  | 29541850 | 29542428 | + | 1.54E-05 | 2.32E-10 | WL |
| 58496     | <i>LY6G5B</i>    | 6  | 31638728 | 31640227 | + | 1.54E-05 | 2.32E-10 | WL |
| 80741     | <i>LY6G5C</i>    | 6  | 31644461 | 31648150 | - | 1.54E-05 | 2.32E-10 | WL |
| 162540    | <i>SPPL2C</i>    | 17 | 43922256 | 43924438 | + | 1.54E-05 | 2.32E-10 | WL |
| 285492    | <i>LINC00955</i> | 4  | 3578596  | 3592712  | + | 1.54E-05 | 2.32E-10 | WL |
| 353003    | <i>HCG4P5</i>    | 6  | 29908689 | 29909578 | - | 1.54E-05 | 2.32E-10 | WL |
| 80868     | <i>HCG4B</i>     | 6  | 29892369 | 29894992 | - | 1.54E-05 | 7.42E-09 | WL |
| 100128977 | <i>MAPT-AS1</i>  | 17 | 43920722 | 43972879 | - | 1.54E-05 | 7.42E-09 | WL |
| 26701     | <i>OR2N1P</i>    | 6  | 29105547 | 29106693 | - | 1.54E-05 | 1.83E-07 | WL |
| 442181    | <i>RPSAP2</i>    | 6  | 28699716 | 28700751 | + | 1.54E-05 | 1.83E-07 | WL |
| 442183    | <i>OR2P1P</i>    | 6  | 29039609 | 29040343 | - | 1.54E-05 | 1.83E-07 | WL |



|           |                  |   |          |          |   |             |          |    |
|-----------|------------------|---|----------|----------|---|-------------|----------|----|
| 646260    | <i>SAR1AP1</i>   | 6 | 29042193 | 29045018 | - | 1.54E-05    | 1.83E-07 | WL |
| 10665     | <i>C6ORF10</i>   | 6 | 32260475 | 32339705 | - | 0.000371751 | 8.73E-18 | WL |
| 352957    | <i>MICF</i>      | 6 | 29819964 | 29821829 | - | 0.000371751 | 8.73E-18 | WL |
| 353009    | <i>3.8-1.4</i>   | 6 | 29833692 | 29834864 | - | 0.000371751 | 8.73E-18 | WL |
| 28973     | <i>MRPS18B</i>   | 6 | 30585275 | 30594174 | + | 0.000371751 | 9.64E-14 | WL |
| 81797     | <i>OR12D3</i>    | 6 | 29341200 | 29343068 | - | 0.000371751 | 9.64E-14 | WL |
| 221545    | <i>C6ORF136</i>  | 6 | 30614816 | 30620987 | + | 0.000371751 | 9.64E-14 | WL |
| 353004    | <i>HCG4P7</i>    | 6 | 29853887 | 29854784 | - | 0.000371751 | 9.64E-14 | WL |
| 5514      | <i>PPP1R10</i>   | 6 | 30568177 | 30585084 | - | 0.000371751 | 5.53E-12 | WL |
| 26529     | <i>OR12D2</i>    | 6 | 29364416 | 29365448 | + | 0.000371751 | 5.53E-12 | WL |
| 100507362 | <i>LINC01015</i> | 6 | 29497183 | 29501345 | + | 0.000371751 | 5.53E-12 | WL |
| 5987      | <i>TRIM27</i>    | 6 | 28870779 | 28891768 | - | 0.000371751 | 2.32E-10 | WL |
| 8449      | <i>DHX16</i>     | 6 | 30620896 | 30640830 | - | 0.000371751 | 2.32E-10 | WL |
| 9292      | <i>GPR53P</i>    | 6 | 29505589 | 29506428 | - | 0.000371751 | 2.32E-10 | WL |
| 387043    | <i>RPL13AP</i>   | 6 | 29550285 | 29550802 | + | 0.000371751 | 2.32E-10 | WL |
| 414760    | <i>HCG14</i>     | 6 | 28864145 | 28865099 | + | 0.000371751 | 2.32E-10 | WL |
| 677820    | <i>SNORA38</i>   | 6 | 31590856 | 31590987 | + | 0.000371751 | 2.32E-10 | WL |
| 692092    | <i>SNORD32B</i>  | 6 | 29550029 | 29550105 | + | 0.000371751 | 2.32E-10 | WL |
| 353008    | <i>3.8-1.3</i>   | 6 | 29878012 | 29879177 | - | 0.000371751 | 7.42E-09 | WL |
| 729583    | <i>C6ORF100</i>  | 6 | 28911561 | 28912315 | + | 0.000371751 | 7.42E-09 | WL |
| 9656      | <i>MDC1</i>      | 6 | 30667584 | 30685458 | - | 0.000371751 | 1.83E-07 | WL |
| 10211     | <i>FLOT1</i>     | 6 | 30695506 | 30710687 | - | 0.000371751 | 1.83E-07 | WL |
| 11270     | <i>NRM</i>       | 6 | 30655824 | 30659197 | - | 0.000371751 | 1.83E-07 | WL |
| 26692     | <i>OR2W1</i>     | 6 | 29011990 | 29012952 | - | 0.000371751 | 1.83E-07 | WL |
| 26694     | <i>OR2U2P</i>    | 6 | 29236242 | 29237198 | - | 0.000371751 | 1.83E-07 | WL |
| 26695     | <i>OR2U1P</i>    | 6 | 29230436 | 29231856 | - | 0.000371751 | 1.83E-07 | WL |
| 79313     | <i>OR2AD1P</i>   | 6 | 28994457 | 28995384 | - | 0.000371751 | 1.83E-07 | WL |
| 170954    | <i>PPP1R18</i>   | 6 | 30644166 | 30655672 | - | 0.000371751 | 1.83E-07 | WL |
| 442190    | <i>OR2B4P</i>    | 6 | 29258373 | 29259527 | + | 0.000371751 | 1.83E-07 | WL |
| 646192    | <i>NOP56P1</i>   | 6 | 28751410 | 28751781 | - | 0.000371751 | 1.83E-07 | WL |
| 646520    | <i>SUCLA2P1</i>  | 6 | 30436650 | 30438699 | + | 0.000371751 | 1.83E-07 | WL |
| 3136      | <i>HLA-H</i>     | 6 | 29855383 | 29858856 | + | 0.005788218 | 9.64E-14 | WL |
| 285830    | <i>HLA-F-AS1</i> | 6 | 29694378 | 29716826 | - | 0.005788218 | 9.64E-14 | WL |
| 4280      | <i>MICE</i>      | 6 | 29709234 | 29716880 | - | 0.005788218 | 5.53E-12 | WL |
| 7932      | <i>OR2H2</i>     | 6 | 29553818 | 29556745 | + | 0.005788218 | 2.32E-10 | WL |
| 80863     | <i>PRRT1</i>     | 6 | 32116140 | 32119720 | - | 0.005788218 | 2.32E-10 | WL |
| 152274    | <i>LOC152274</i> | 3 | 14840838 | 14852921 | - | 0.005788218 | 2.32E-10 | WL |
| 353020    | <i>HCG4P11</i>   | 6 | 29688955 | 29689944 | - | 0.005788218 | 2.32E-10 | WL |
| 442192    | <i>DDX6P1</i>    | 6 | 29297406 | 29298838 | - | 0.005788218 | 2.32E-10 | WL |
| 23        | <i>ABCF1</i>     | 6 | 30539170 | 30559309 | + | 0.005788218 | 7.42E-09 | WL |
| 3133      | <i>HLA-E</i>     | 6 | 30457183 | 30461982 | + | 0.005788218 | 7.42E-09 | WL |

|        |                  |    |          |          |   |             |          |    |
|--------|------------------|----|----------|----------|---|-------------|----------|----|
| 3134   | <i>HLA-F</i>     | 6  | 29691117 | 29695073 | + | 0.005788218 | 7.42E-09 | WL |
| 3879   | <i>KRT18P1</i>   | 6  | 28936849 | 28938244 | - | 0.005788218 | 7.42E-09 | WL |
| 6148   | <i>RPL23AP1</i>  | 6  | 29694409 | 29694931 | - | 0.005788218 | 7.42E-09 | WL |
| 221547 | <i>RANP1</i>     | 6  | 30453662 | 30454724 | + | 0.005788218 | 7.42E-09 | WL |
| 414766 | <i>HCG16</i>     | 6  | 28953755 | 28956399 | + | 0.005788218 | 7.42E-09 | WL |
| 282890 | <i>ZNF311</i>    | 6  | 28962562 | 28973037 | - | 0.005788218 | 1.83E-07 | WL |
| 387044 | <i>RPL13P</i>    | 6  | 28829177 | 28829793 | + | 0.005788218 | 1.83E-07 | WL |
| 401242 | <i>LOC401242</i> | 6  | 28827402 | 28831454 | - | 0.005788218 | 1.83E-07 | WL |
| 63940  | <i>GPSM3</i>     | 6  | 32158543 | 32163300 | - | 0.05724465  | 5.53E-12 | WL |
| 10554  | <i>AGPAT1</i>    | 6  | 32135983 | 32145888 | - | 0.05724465  | 2.32E-10 | WL |
| 177    | <i>AGER</i>      | 6  | 32148745 | 32152099 | - | 0.05724465  | 7.42E-09 | WL |
| 5089   | <i>PBX2</i>      | 6  | 32152510 | 32157963 | - | 0.05724465  | 7.42E-09 | WL |
| 6048   | <i>RNF5</i>      | 6  | 32146162 | 32148570 | + | 0.05724465  | 7.42E-09 | WL |
| 9374   | <i>PPT2</i>      | 6  | 32121229 | 32131458 | + | 0.05724465  | 7.42E-09 | WL |
| 80864  | <i>EGFL8</i>     | 6  | 32132382 | 32136062 | + | 0.05724465  | 7.42E-09 | WL |
| 4277   | <i>MICB</i>      | 6  | 31462054 | 31478901 | + | 0.05724465  | 1.83E-07 | WL |
| 149775 | <i>GNAS-AS1</i>  | 20 | 57393973 | 57425958 | - | 0.336579569 | 1.83E-07 | WL |

Gene Id<sup>1</sup>: NCBI gene identifier

Gene\_p (PAR-dr)<sup>2</sup>: meta-analysis p-value of paragraph delayed recall (PAR-dr)

Gene\_p (WL-dr)<sup>3</sup>: meta-analysis p-value of word list delayed recall (WL-dr)

Significant<sup>4</sup>: both PAR-dr and WL-dr are significant after multiple adjustment (BOTH); only PAR-dr is significant (PAR) and only WL-dr is significant (WL)

**Table S6. Significant component genes in the six memory-associated pathways**

| GeneID      | Gene            | Class  | Chr | Start (bp) | End (bp) | Strand | GEO_ID                          |
|-------------|-----------------|--------|-----|------------|----------|--------|---------------------------------|
| 3105        | <i>HLA-A</i>    | MHC I  | 6   | 29910247   | 29913661 | +      | GDS4135,<br>GDS4231,<br>GDS4358 |
| 3106        | <i>HLA-B</i>    | MHC I  | 6   | 31321649   | 31324989 | -      | GDS4135,<br>GDS4231,<br>GDS4358 |
| 3107        | <i>HLA-C</i>    | MHC I  | 6   | 31236526   | 31239913 | -      | GDS4135,<br>GDS4231,<br>GDS4358 |
| 3133        | <i>HLA-E</i>    | MHC I  | 6   | 30457183   | 30461982 | +      | GDS4135,<br>GDS4231,<br>GDS4358 |
| 3134        | <i>HLA-F</i>    | MHC I  | 6   | 29691117   | 29695073 | +      | GDS4135,<br>GDS4231,<br>GDS4358 |
| 3135        | <i>HLA-G</i>    | MHC I  | 6   | 29794756   | 29798899 | +      | GDS4135,<br>GDS4231,<br>GDS4358 |
| <b>3136</b> | <i>HLA-H</i>    | MHC I  | 6   | 29855383   | 29858856 | +      |                                 |
| 3108        | <i>HLA-DMA</i>  | MHC II | 6   | 32916391   | 32920900 | -      | GDS4135,<br>GDS4231,<br>GDS4358 |
| 3109        | <i>HLA-DMB</i>  | MHC II | 6   | 32902406   | 32908847 | -      | GDS4135,<br>GDS4231,<br>GDS4358 |
| 3113        | <i>HLA-DPA1</i> | MHC II | 6   | 33032346   | 33048555 | -      | GDS4135,<br>GDS4231,<br>GDS4358 |
| 3115        | <i>HLA-DPB1</i> | MHC II | 6   | 33043703   | 33057473 | +      | GDS4135,<br>GDS4231,<br>GDS4358 |
| 3116        | <i>HLA-DPB2</i> | MHC II | 6   | 33080293   | 33096890 | +      | GDS4135,<br>GDS4231,<br>GDS4358 |
| <b>3118</b> | <i>HLA-DQA2</i> | MHC II | 6   | 32709156   | 32714664 | +      |                                 |
| 3120        | <i>HLA-DQB2</i> | MHC II | 6   | 32723837   | 32731330 | -      | GDS4135,<br>GDS4231,<br>GDS4358 |
| 3122        | <i>HLA-DRA</i>  | MHC II | 6   | 32407619   | 32412823 | +      | GDS4135,<br>GDS4231,<br>GDS4358 |

**NOTE:** This table shows the characteristics of the significant component genes from the six memory-associated pathways. GeneID is the NCBI gene identifier; Gene is the gene name or symbol; Class is the class of the specific MHC gene; chr is the chromosome; start(bp) is the basepair position corresponding to the

beginning of the gene; end(bp) is the basepair position corresponding to the end of the gene; Strand indicates the strand corresponding to the start and end basepair positions; and GEO\_ID: the expression data that has the gene measured.

**Table S7. Homologous genes in memory-associated pathways for differential expression analysis**

| House mouse    |                                                                     |           |                    |
|----------------|---------------------------------------------------------------------|-----------|--------------------|
| Human          | Homologous Gene                                                     | Gene ID   | GEO_ID             |
| <i>HLA-A</i>   | H2-K1 histocompatibility 2, K1, K region                            | 14972     | GDS2082            |
|                | H2-D1 histocompatibility 2, D region locus 1                        | 14964     | GDS2082            |
|                | H2-B1 histocompatibility 2, blastocyst                              | 14963     | GDS2082            |
|                | H2-Q7 histocompatibility 2, Q region locus 7                        | 15018     | GDS2082            |
|                | H2-Q10 histocompatibility 2, Q region locus 10                      | 15007     | GDS2082            |
|                | H2-Q1 histocompatibility 2, Q region locus 1                        | 15006     | GDS2082            |
| <i>HLA-G</i>   | H2-M3 histocompatibility 2, M region locus 3                        | 14991     | GDS2082            |
| <i>HLA-H</i>   | Hfe hemochromatosis                                                 | 15216     | GDS2082            |
| <i>HLA-DMA</i> | H2-DMA histocompatibility 2, class II, locus Dma                    | 14998     | GDS2082            |
| <i>HLA-DMB</i> | H2-DMb2 histocompatibility 2, class II, locus Mb2                   | 15000     | GDS2082            |
|                | H2-DMb1 histocompatibility 2, class II, locus Mb1                   | 14999     | GDS2082            |
| <i>HLA-DRA</i> | H2-Ea-ps histocompatibility 2, class II antigen E alpha, pseudogene | 100504404 | GDS2082            |
| Norway rat     |                                                                     |           |                    |
| <i>HLA-A</i>   | RT1-CE5 RT1 class I, locus CE5                                      | 309607    | GDS2639            |
|                | RT1-CE16 RT1 class I, locus CE16                                    | 414819    | GDS2639,<br>GDS520 |
| <i>HLA-E</i>   | RT1-S3 RT1 class Ib, locus S3                                       | 294228    | GDS2639,<br>GDS520 |
| <i>HLA-G</i>   | RT1-M3-1 RT1 class Ib, locus M3, gene 1                             | 24747     | GDS2639,<br>GDS520 |
| <i>HLA-H</i>   | Hfe hemochromatosis                                                 | 29199     | GDS2639,<br>GDS520 |
| <i>HLA-DRA</i> | RT1-Da RT1 class II, locus Da                                       | 294269    | GDS2639,<br>GDS520 |

**NOTE:** GeneID is the NCBI gene identifier; and GEO\_ID: the expression data that has the gene measured.

## 4. Supplemental Figures

Figure S1: GWAS cohorts and microarray expression datasets

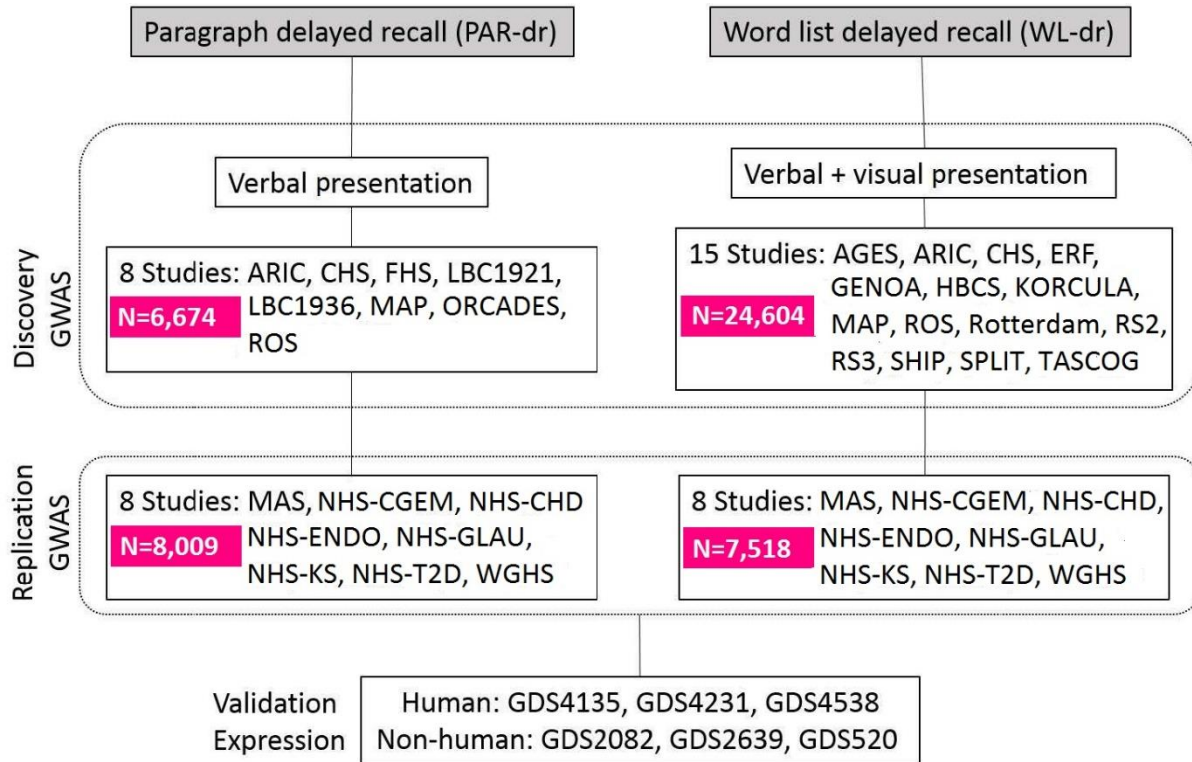

Figure S1. Samples included in the discovery, replication, and differential expression analyses. The discovery pathway analyses included eight cohorts with paragraph delayed recall (PAR-dr) and fifteen cohorts with word list delayed recall (WL-dr). The replication pathway analyses contained eight cohorts for both PAR-dr and WL-dr. The microarray expression studies included three human and three rodent curated data sets from the NCBI Gene Expression Omnibus (GEO). Sample size of each cohort and summaries of the GWAS SNPs are shown in **Tables S1 and S2**.

Figure S2: Design of the pathway analyses

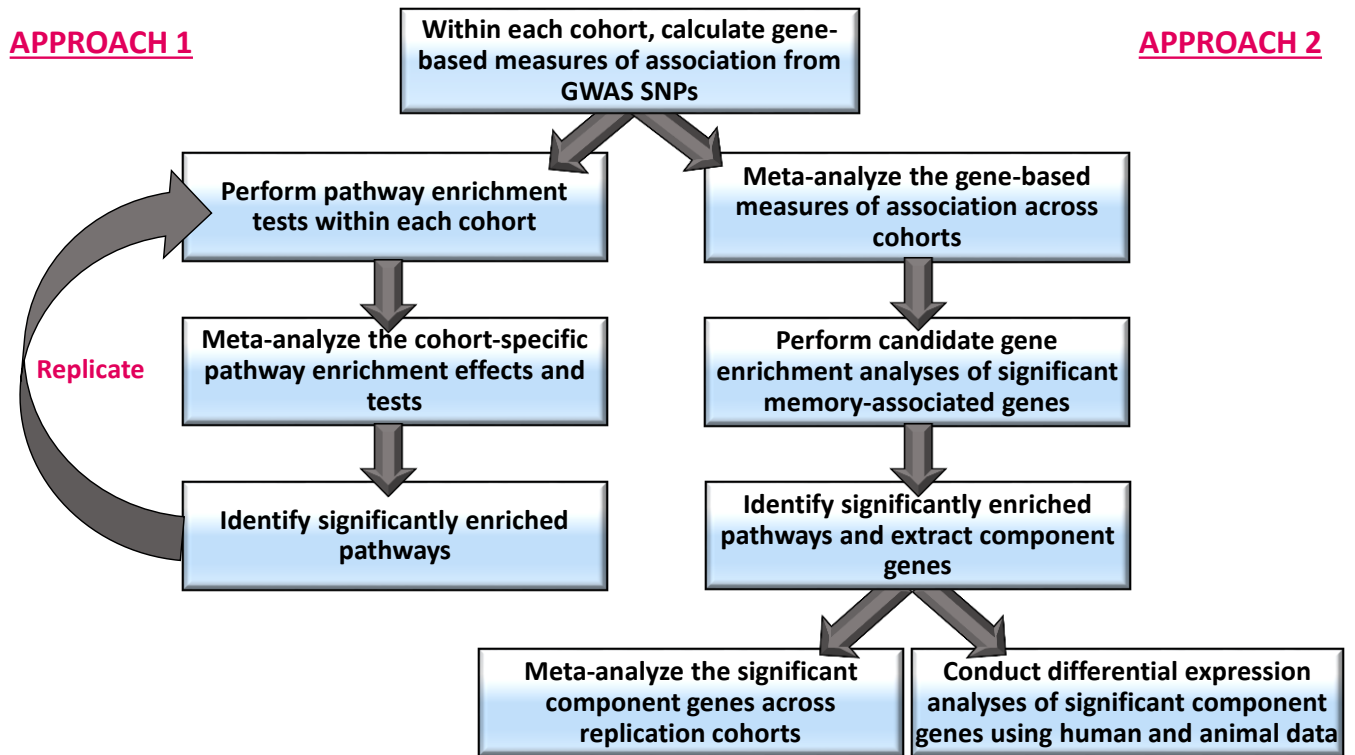

**Figure S3. Forest plots of significant pathway enrichment effects and p-values from discovery cohorts (Approach 1)**

**Pathway: KEGG type 1 diabetes**

N: the number of effective genes in the pathway; M: the number of significant genes; and Padj: permutation-adjusted pathway p-value at an individual study.

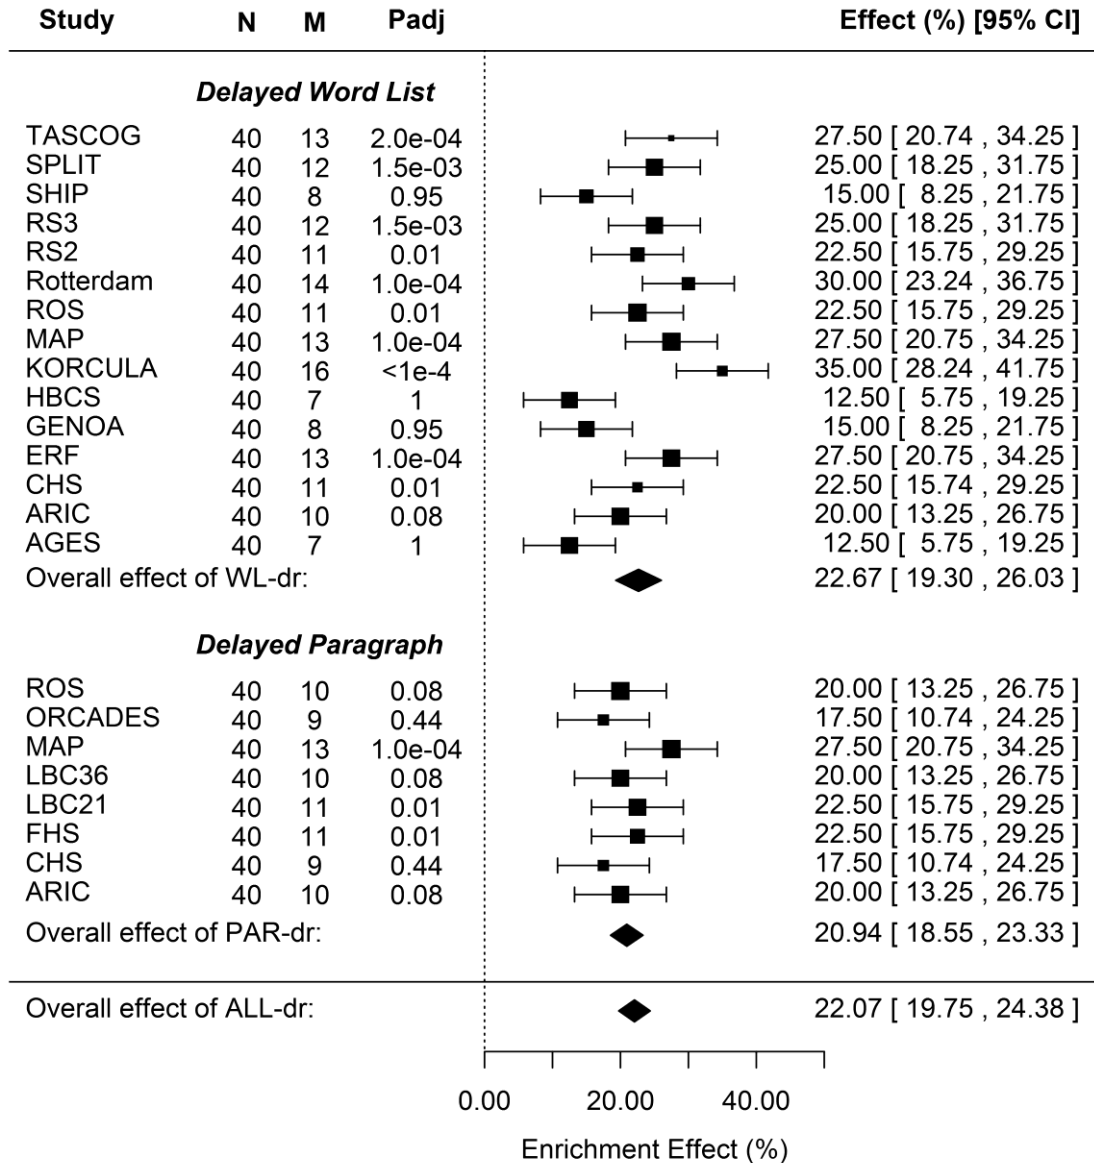



**Pathway: PSMD4 targets (snpGeneSets PID 7100)**

N: the number of effective genes in the pathway; M: the number of significant genes; and Padj: permutation-adjusted pathway p-value at an individual study.

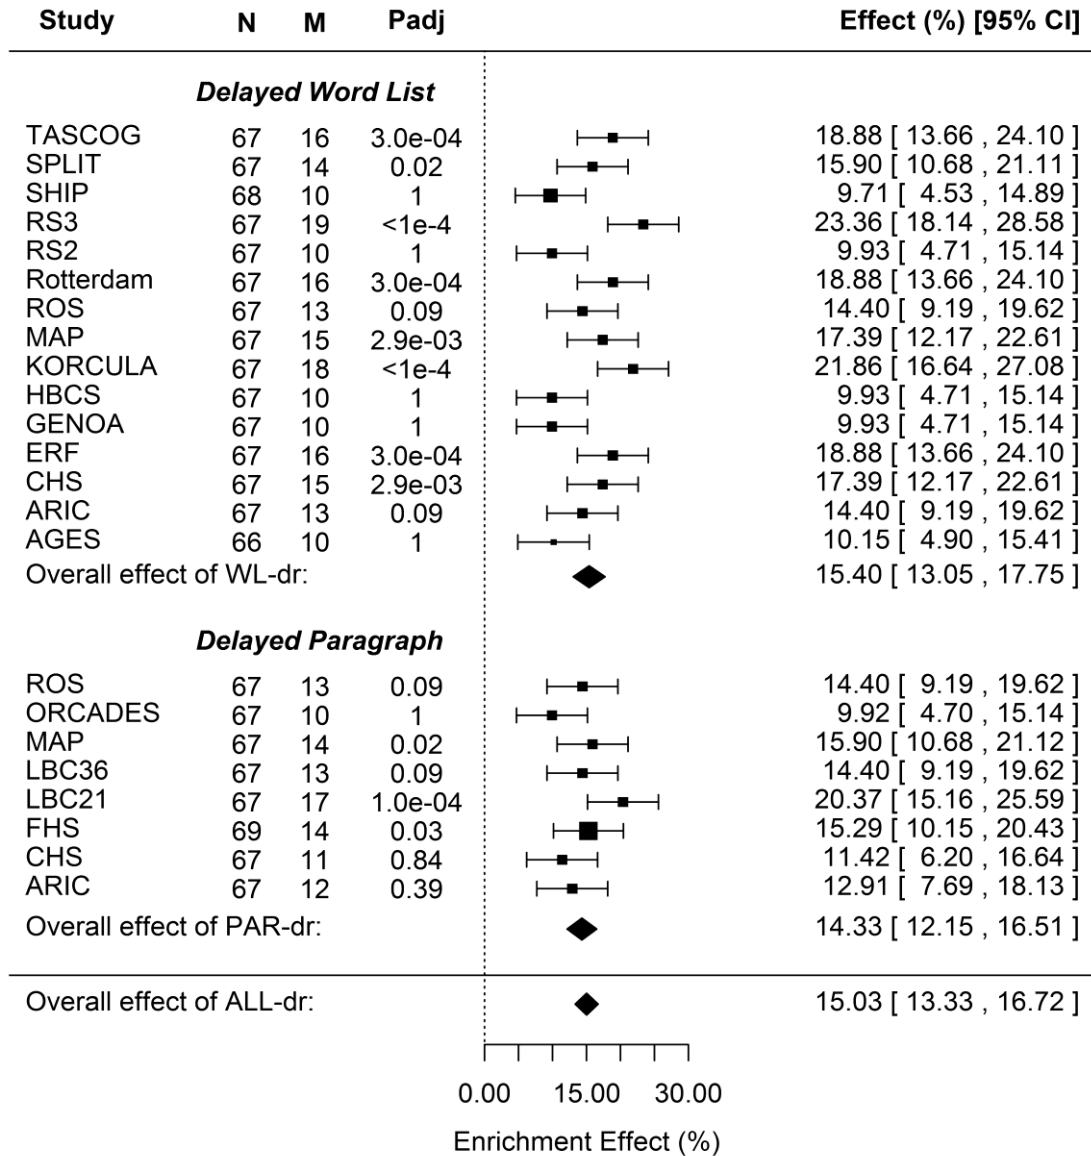

**Pathway: KEGG graft-versus-host disease (snpGeneSets PID 2898)**

N: the number of effective genes in the pathway; M: the number of significant genes; and Padj: permutation-adjusted pathway p-value at an individual study.

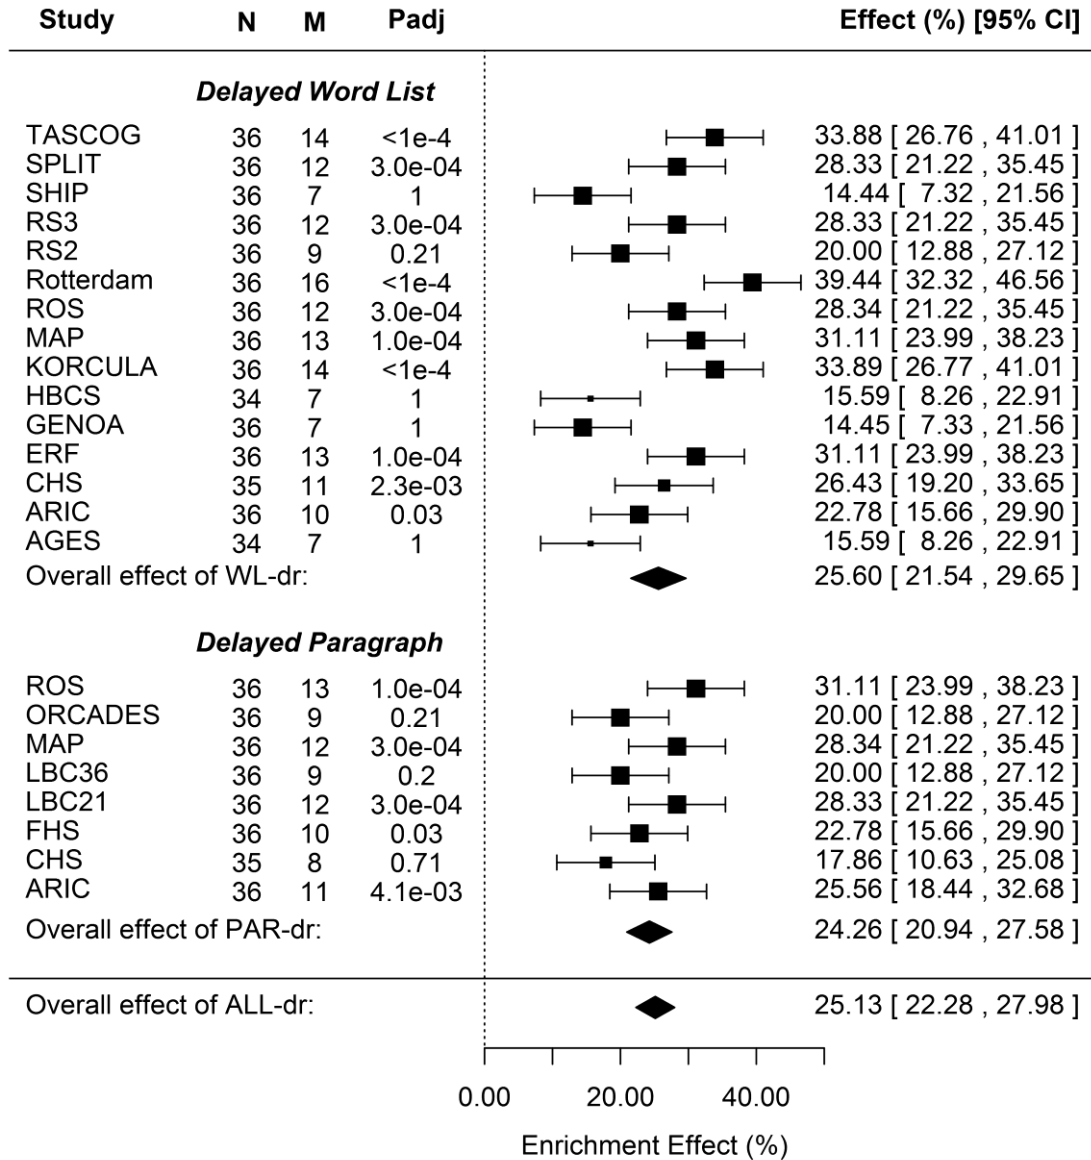

Pathway: KEGG allograft rejection (snpGeneSets PID 2897)

N: the number of effective genes in the pathway; M: the number of significant genes; and Padj: permutation-adjusted pathway p-value at an individual study.

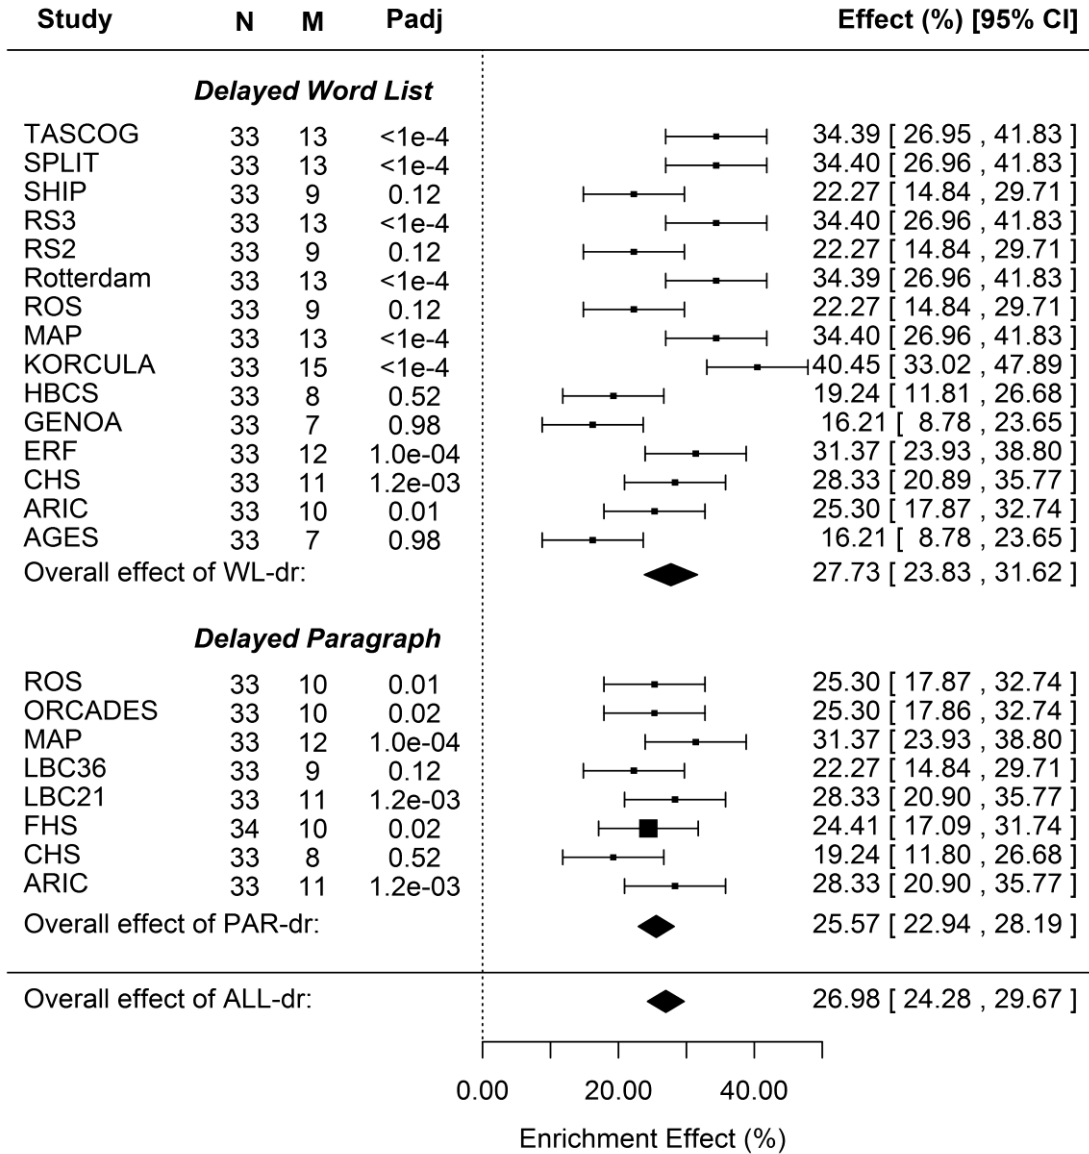

**Pathway: KEGG antigen processing and presentation (snpGeneSets PID 2837)**

N: the number of effective genes in the pathway; M: the number of significant genes; and Padj: permutation-adjusted pathway p-value at an individual study.

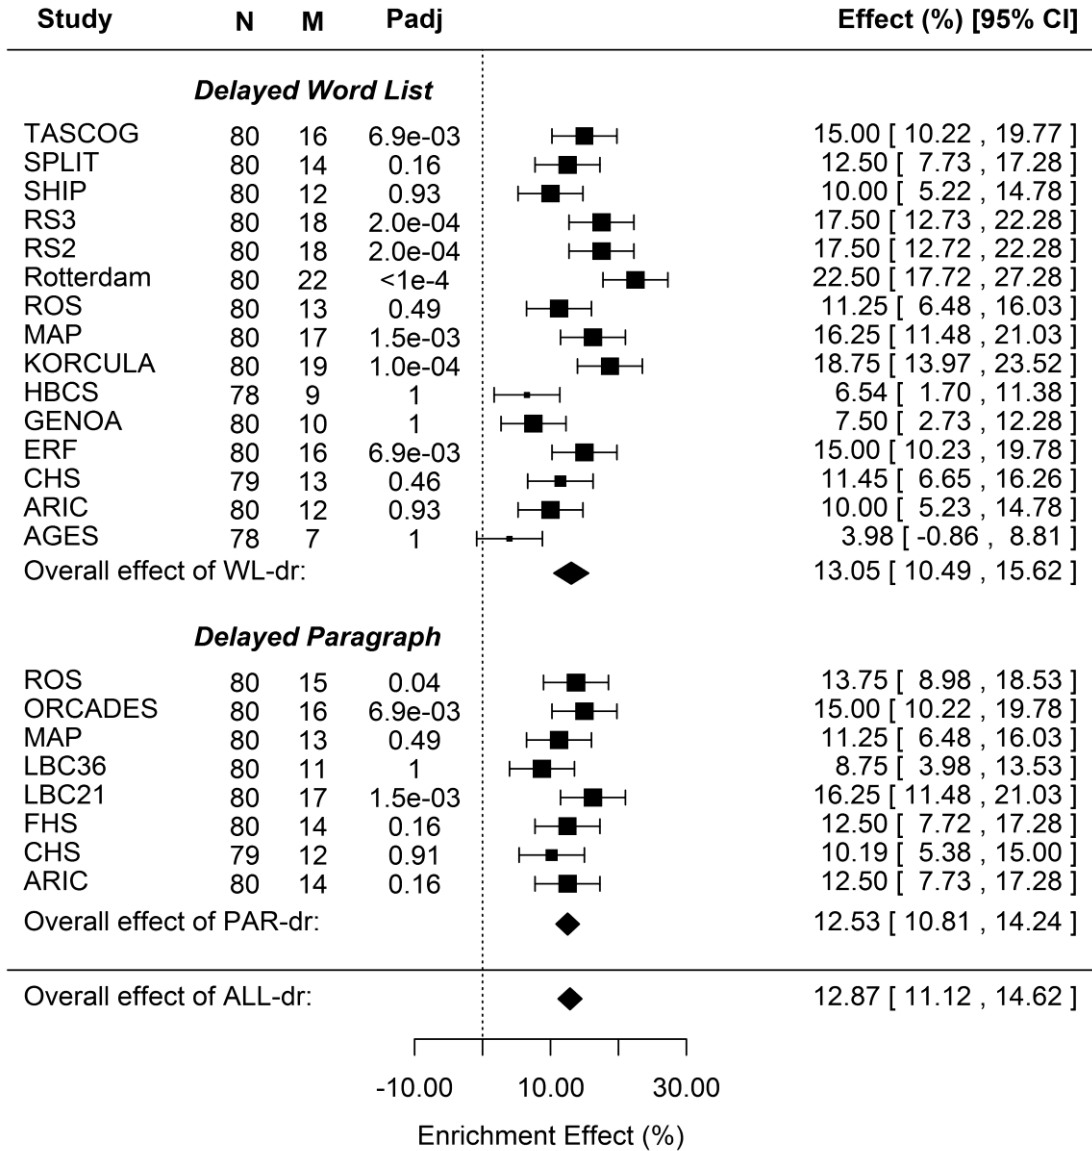

**Pathway: KEGG viral myocarditis (snpGeneSets PID 2903)**

N: the number of effective genes in the pathway; M: the number of significant genes; and Padj: permutation-adjusted pathway p-value at an individual study.

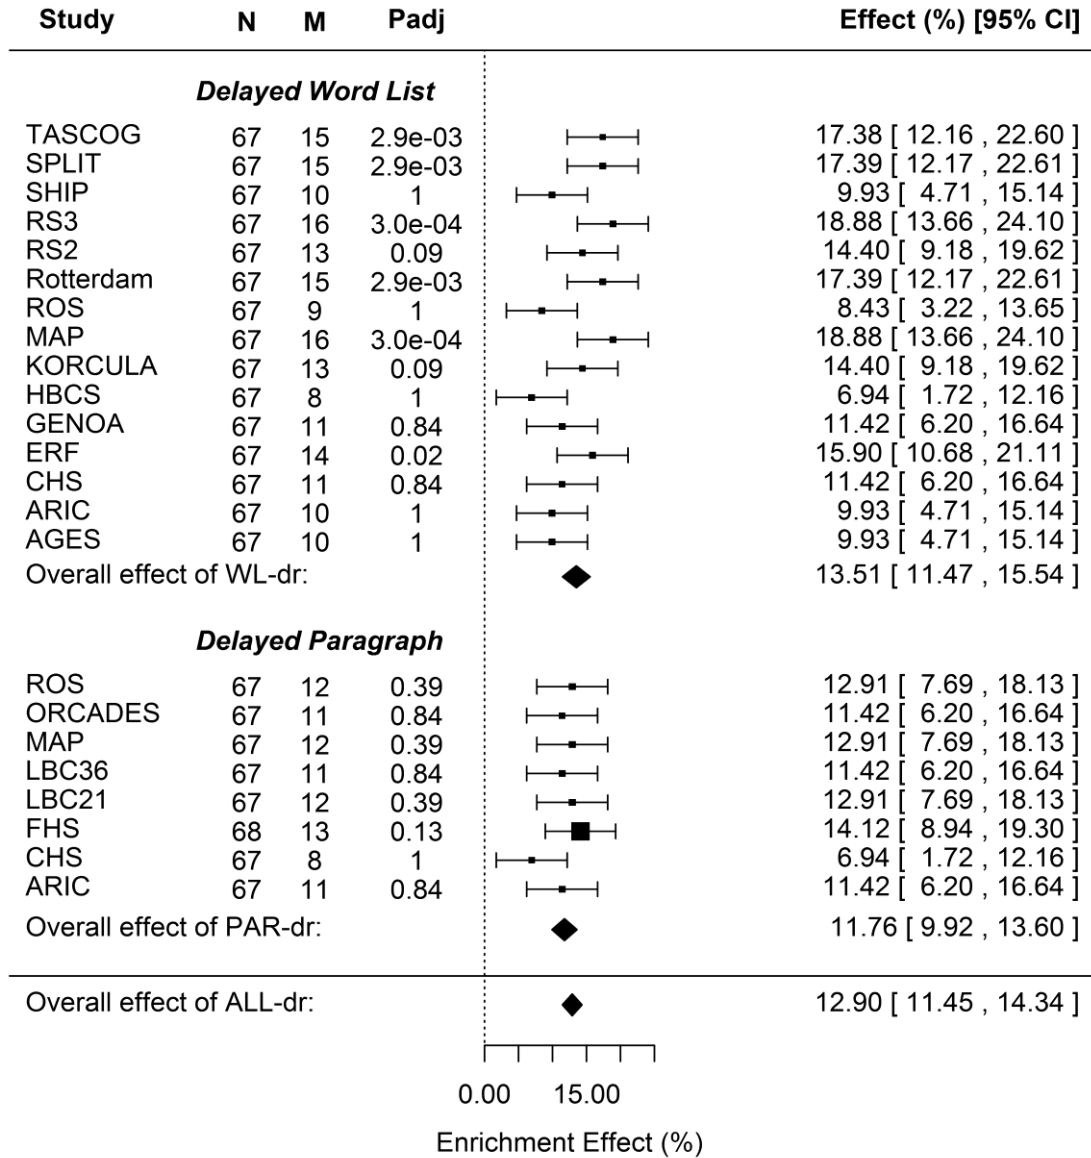

## 5. References:

- 1 Psaty, B. M. *et al.* Cohorts for Heart and Aging Research in Genomic Epidemiology (CHARGE) Consortium: Design of prospective meta-analyses of genome-wide association studies from 5 cohorts. *Circulation. Cardiovascular genetics* **2**, 73-80, doi:10.1161/CIRCGENETICS.108.829747 (2009).
- 2 Debette, S. *et al.* Genome-wide studies of verbal declarative memory in nondemented older people: the Cohorts for Heart and Aging Research in Genomic Epidemiology consortium. *Biological psychiatry* **77**, 749-763, doi:10.1016/j.biopsych.2014.08.027 (2015).
- 3 The Atherosclerosis Risk in Communities (ARIC) Study: design and objectives. The ARIC investigators. *American journal of epidemiology* **129**, 687-702 (1989).
- 4 Rosamond, W. D. *et al.* Stroke incidence and survival among middle-aged adults: 9-year follow-up of the Atherosclerosis Risk in Communities (ARIC) cohort. *Stroke* **30**, 736-743 (1999).
- 5 Mosley, T. H., Jr. *et al.* Cerebral MRI findings and cognitive functioning: the Atherosclerosis Risk in Communities study. *Neurology* **64**, 2056-2062, doi:10.1212/01.WNL.0000165985.97397.88 (2005).
- 6 Knopman, D. S. & Ryberg, S. A verbal memory test with high predictive accuracy for dementia of the Alzheimer type. *Archives of neurology* **46**, 141-145 (1989).
- 7 Knopman, D. S., Mosley, T. H., Catellier, D. J., Coker, L. H. & Atherosclerosis Risk in Communities Study Brain, M. R. I. S. Fourteen-year longitudinal study of vascular risk factors, APOE genotype, and cognition: the ARIC MRI Study. *Alzheimer's & dementia : the journal of the Alzheimer's Association* **5**, 207-214, doi:10.1016/j.jalz.2009.01.027 (2009).
- 8 Lesage, S. R. *et al.* Retinal microvascular abnormalities and cognitive decline: the ARIC 14-year follow-up study. *Neurology* **73**, 862-868, doi:10.1212/WNL.0b013e3181b78436 (2009).
- 9 Fried, L. P. *et al.* The Cardiovascular Health Study: design and rationale. *Annals of epidemiology* **1**, 263-276 (1991).
- 10 Longstreth, W. T., Jr. *et al.* Frequency and predictors of stroke death in 5,888 participants in the Cardiovascular Health Study. *Neurology* **56**, 368-375 (2001).
- 11 Lopez, O. L. *et al.* Evaluation of dementia in the cardiovascular health cognition study. *Neuroepidemiology* **22**, 1-12, doi:67110 (2003).
- 12 Lopez, O. L. *et al.* Neuropsychological characteristics of mild cognitive impairment subgroups. *J Neurol Neurosurg Psychiatry* **77**, 159-165, doi:10.1136/jnnp.2004.045567 (2006).
- 13 D, D., J, K. & E, K. *The California Verbal Learning Test-Research Edition*. (New York, NY: Psychological Corporation, 1987).
- 14 D, W. (New York: Psychological Corporation).
- 15 Dawber, T. R. & Kannel, W. B. The Framingham study. An epidemiological approach to coronary heart disease. *Circulation* **34**, 553-555 (1966).
- 16 Feinleib, M., Kannel, W. B., Garrison, R. J., McNamara, P. M. & Castelli, W. P. The Framingham Offspring Study. Design and preliminary data. *Prev Med* **4**, 518-525 (1975).
- 17 Splansky, G. L. *et al.* The Third Generation Cohort of the National Heart, Lung, and Blood Institute's Framingham Heart Study: design, recruitment, and initial examination. *American journal of epidemiology* **165**, 1328-1335, doi:10.1093/aje/kwm021 (2007).
- 18 Au, R. *et al.* New norms for a new generation: cognitive performance in the framingham offspring cohort. *Exp Aging Res* **30**, 333-358, doi:10.1080/03610730490484380 (2004).
- 19 D, W. *Wechsler memory scale*. (Psychological Corporation, 1945).
- 20 Carandang, R. *et al.* Trends in incidence, lifetime risk, severity, and 30-day mortality of stroke over the past 50 years. *JAMA : the journal of the American Medical Association* **296**, 2939-2946, doi:10.1001/jama.296.24.2939 (2006).

- 21 Seshadri, S. *et al.* The lifetime risk of stroke: estimates from the Framingham Study. *Stroke* **37**, 345-350, doi:10.1161/01.STR.0000199613.38911.b2 (2006).
- 22 Deary, I. J. *et al.* The Lothian Birth Cohort 1936: a study to examine influences on cognitive ageing from age 11 to age 70 and beyond. *BMC geriatrics* **7**, 28, doi:10.1186/1471-2318-7-28 (2007).
- 23 Deary, I. J., Whiteman, M. C., Starr, J. M., Whalley, L. J. & Fox, H. C. The impact of childhood intelligence on later life: following up the Scottish mental surveys of 1932 and 1947. *Journal of personality and social psychology* **86**, 130-147, doi:10.1037/0022-3514.86.1.130 (2004).
- 24 Deary, I. J., Gow, A. J., Pattie, A. & Starr, J. M. Cohort profile: the Lothian Birth Cohorts of 1921 and 1936. *Int J Epidemiol* **41**, 1576-1584, doi:10.1093/ije/dyr197 (2012).
- 25 D, W. *WMS-IIIUK administration and scoring manual*. (Psychological Corporation, 1998).
- 26 Chibnik, L. B. *et al.* CR1 is associated with amyloid plaque burden and age-related cognitive decline. *Annals of neurology* **69**, 560-569, doi:10.1002/ana.22277 (2011).
- 27 Bennett, D. A. *et al.* Neuropathology of older persons without cognitive impairment from two community-based studies. *Neurology* **66**, 1837-1844, doi:10.1212/01.wnl.0000219668.47116.e6 (2006).
- 28 Bennett, D. A. *et al.* The Rush Memory and Aging Project: study design and baseline characteristics of the study cohort. *Neuroepidemiology* **25**, 163-175, doi:10.1159/000087446 (2005).
- 29 Morris, J. C. *et al.* The Consortium to Establish a Registry for Alzheimer's Disease (CERAD). Part I. Clinical and neuropsychological assessment of Alzheimer's disease. *Neurology* **39**, 1159-1165 (1989).
- 30 McQuillan, R. *et al.* Runs of homozygosity in European populations. *American journal of human genetics* **83**, 359-372, doi:10.1016/j.ajhg.2008.08.007 (2008).
- 31 Harris, T. B. *et al.* Age, Gene/Environment Susceptibility-Reykjavik Study: multidisciplinary applied phenomics. *American journal of epidemiology* **165**, 1076-1087, doi:10.1093/aje/kwk115 (2007).
- 32 Palm, W. M. *et al.* Ventricular dilation: association with gait and cognition. *Annals of neurology* **66**, 485-493, doi:10.1002/ana.21739 (2009).
- 33 Service, S. *et al.* Magnitude and distribution of linkage disequilibrium in population isolates and implications for genome-wide association studies. *Nature genetics* **38**, 556-560, doi:10.1038/ng1770 (2006).
- 34 Aulchenko, Y. S. *et al.* Linkage disequilibrium in young genetically isolated Dutch population. *European journal of human genetics : EJHG* **12**, 527-534, doi:10.1038/sj.ejhg.5201188 (2004).
- 35 van Koolwijk, L. M. *et al.* Association of cognitive functioning with retinal nerve fiber layer thickness. *Investigative ophthalmology & visual science* **50**, 4576-4580, doi:10.1167/iovs.08-3181 (2009).
- 36 A, R. *L'Examen Clinique en Psychologie*. (Presses Universitaires de France, 1964).
- 37 Lahti, J. *et al.* Glucocorticoid receptor gene haplotype predicts increased risk of hospital admission for depressive disorders in the Helsinki birth cohort study. *J Psychiatr Res* **45**, 1160-1164, doi:10.1016/j.jpsychires.2011.03.008 (2011).
- 38 Barker, D. J., Osmond, C., Forsen, T. J., Kajantie, E. & Eriksson, J. G. Trajectories of growth among children who have coronary events as adults. *The New England journal of medicine* **353**, 1802-1809, doi:10.1056/NEJMoa044160 (2005).
- 39 Rudan, I., Campbell, H. & Rudan, P. Genetic epidemiological studies of eastern Adriatic Island isolates, Croatia: objective and strategies. *Coll Antropol* **23**, 531-546 (1999).
- 40 Rudan, I. *et al.* Effects of inbreeding, endogamy, genetic admixture, and outbreeding on human health: a (1001 Dalmatians) study. *Croatian medical journal* **47**, 601-610 (2006).
- 41 Campbell, H. *et al.* Effects of genome-wide heterozygosity on a range of biomedically relevant human quantitative traits. *Hum Mol Genet* **16**, 233-241, doi:10.1093/hmg/ddl473 (2007).
- 42 Polasek, O. *et al.* Genome-wide association study of anthropometric traits in Korcula Island, Croatia. *Croatian medical journal* **50**, 7-16 (2009).

- 43 Vitart, V. *et al.* Heritabilities of ocular biometrical traits in two croatian isolates with extended pedigrees. *Investigative ophthalmology & visual science* **51**, 737-743, doi:10.1167/iov.09-3720 (2010).
- 44 Vitart, V. *et al.* SLC2A9 is a newly identified urate transporter influencing serum urate concentration, urate excretion and gout. *Nature genetics* **40**, 437-442, doi:10.1038/ng.106 (2008).
- 45 Ikram, M. A. *et al.* Objectives, design and main findings until 2020 from the Rotterdam Study. *Eur J Epidemiol* **35**, 483-517, doi:10.1007/s10654-020-00640-5 (2020).
- 46 Hofman, A. *et al.* The Rotterdam Study: 2010 objectives and design update. *Eur J Epidemiol* **24**, 553-572, doi:10.1007/s10654-009-9386-z (2009).
- 47 Hofman, A., Grobbee, D. E., de Jong, P. T. & van den Ouweland, F. A. Determinants of disease and disability in the elderly: the Rotterdam Elderly Study. *Eur J Epidemiol* **7**, 403-422 (1991).
- 48 Hofman, A. Recent trends in cardiovascular epidemiology. *Eur J Epidemiol* **24**, 721-723, doi:10.1007/s10654-009-9410-3 (2009).
- 49 Prins, N. D. *et al.* Cerebral small-vessel disease and decline in information processing speed, executive function and memory. *Brain : a journal of neurology* **128**, 2034-2041, doi:10.1093/brain/awh553 (2005).
- 50 Brand, N. & Jolles, J. Learning and retrieval rate of words presented auditorily and visually. *J Gen Psychol* **112**, 201-210, doi:10.1080/00221309.1985.9711004 (1985).
- 51 Bots, M. L. *et al.* Prevalence of stroke in the general population. The Rotterdam Study. *Stroke* **27**, 1499-1501 (1996).
- 52 Hollander, M. *et al.* Incidence, risk, and case fatality of first ever stroke in the elderly population. The Rotterdam Study. *J Neurol Neurosurg Psychiatry* **74**, 317-321 (2003).
- 53 Volzke, H. *et al.* Cohort profile: the study of health in Pomerania. *Int J Epidemiol* **40**, 294-307, doi:10.1093/ije/dyp394 (2011).
- 54 Wittchen, H. U., Lachner, G., Wunderlich, U. & Pfister, H. Test-retest reliability of the computerized DSM-IV version of the Munich-Composite International Diagnostic Interview (M-CIDI). *Soc Psychiatry Psychiatr Epidemiol* **33**, 568-578 (1998).
- 55 Appel, K. *et al.* Moderation of adult depression by a polymorphism in the FKBP5 gene and childhood physical abuse in the general population. *Neuropsychopharmacology* **36**, 1982-1991, doi:10.1038/npp.2011.81 (2011).
- 56 Callisaya, M. L. *et al.* A population-based study of sensorimotor factors affecting gait in older people. *Age Ageing* **38**, 290-295, doi:10.1093/ageing/afp017 (2009).
- 57 Martin, K. *et al.* Visuospatial ability and memory are associated with falls risk in older people: a population-based study. *Dement Geriatr Cogn Disord* **27**, 451-457, doi:10.1159/000216840 (2009).
- 58 M, L. *Neuropsychological testing*. (Oxford University Press, 2004).
- 59 Sachdev, P. S. *et al.* The Sydney Memory and Ageing Study (MAS): methodology and baseline medical and neuropsychiatric characteristics of an elderly epidemiological non-demented cohort of Australians aged 70-90 years. *Int Psychogeriatr* **22**, 1248-1264, doi:10.1017/S1041610210001067 (2010).
- 60 D, W. *Wechsler Memory Scale - Third edition*. (The Psychological Corporation, 1997).
- 61 Ridker, P. M. *et al.* Rationale, design, and methodology of the Women's Genome Health Study: a genome-wide association study of more than 25,000 initially healthy american women. *Clin Chem* **54**, 249-255, doi:10.1373/clinchem.2007.099366 (2008).
- 62 Kang, J. H. & Grodstein, F. Postmenopausal hormone therapy, timing of initiation, APOE and cognitive decline. *Neurobiology of aging* **33**, 1129-1137, doi:10.1016/j.neurobiolaging.2010.10.007 (2012).
- 63 Barrett, T. *et al.* NCBI GEO: archive for functional genomics data sets--10 years on. *Nucleic Acids Res* **39**, D1005-1010, doi:10.1093/nar/gkq1184 (2011).



- 64 Simpson, J. E. *et al.* Microarray analysis of the astrocyte transcriptome in the aging brain: relationship to Alzheimer's pathology and APOE genotype. *Neurobiology of aging* **32**, 1795-1807, doi:10.1016/j.neurobiolaging.2011.04.013 (2011).
- 65 Borjabad, A. *et al.* Significant effects of antiretroviral therapy on global gene expression in brain tissues of patients with HIV-1-associated neurocognitive disorders. *PLoS pathogens* **7**, e1002213, doi:10.1371/journal.ppat.1002213 (2011).
- 66 Gelman, B. B. *et al.* The National NeuroAIDS Tissue Consortium brain gene array: two types of HIV-associated neurocognitive impairment. *PLoS One* **7**, e46178, doi:10.1371/journal.pone.0046178 (2012).
- 67 NCBI HomoloGene. <https://www.ncbi.nlm.nih.gov/homologene>.
- 68 Verbitsky, M. *et al.* Altered hippocampal transcript profile accompanies an age-related spatial memory deficit in mice. *Learn Mem* **11**, 253-260, doi:10.1101/lm.68204 (2004).
- 69 Rowe, W. B. *et al.* Hippocampal expression analyses reveal selective association of immediate-early, neuroenergetic, and myelinogenic pathways with cognitive impairment in aged rats. *J Neurosci* **27**, 3098-3110, doi:10.1523/JNEUROSCI.4163-06.2007 (2007).
- 70 Blalock, E. M. *et al.* Gene microarrays in hippocampal aging: statistical profiling identifies novel processes correlated with cognitive impairment. *J Neurosci* **23**, 3807-3819 (2003).
